*N. Sanchez de Groot et al.*

1                                   **Insights into the structure-driven**  
2                                   **protein interactivity of RNA molecules**

3  
4   Natalia Sanchez de Groot<sup>1,2</sup>, Alexandros Armaos<sup>1,2</sup>, Ricardo Graña Montes<sup>1,2</sup>, Marion Alriquet,<sup>3,4</sup> Giulia  
5   Calloni,<sup>3,4</sup> R. Martin Vabulas,<sup>3,4</sup> and Gian Gaetano Tartaglia<sup>1,2,5,\*</sup>

6  
7  
8   <sup>1</sup> Centre for Genomic Regulation (CRG), The Barcelona Institute for Science and Technology, Dr. Aiguader  
9   88, 08003 Barcelona, Spain

10  <sup>2</sup> Universitat Pompeu Fabra (UPF), 08003 Barcelona, Spain

11  <sup>3</sup> Buchmann Institute for Molecular Life Sciences, Goethe University Frankfurt, Frankfurt am Main,  
12  Germany.

13  <sup>4</sup> Institute of Biophysical Chemistry, Goethe University Frankfurt, Frankfurt am Main, Germany.

14  <sup>5</sup> Institució Catalana de Recerca i Estudis Avançats (ICREA), 23 Passeig Lluís Companys, 08010  
15  Barcelona, Spain

16  \* Correspondence to: [gian.tartaglia@crg.eu](mailto:gian.tartaglia@crg.eu)

*N. Sanchez de Groot et al.*

20 **ABSTRACT**

21

22 The combination of high-throughput sequencing and *in vivo* crosslinking approaches leads to the  
23 progressive uncovering of the complex interdependence between cellular transcriptome and proteome. Yet  
24 the molecular determinants that govern interactions in protein-RNA networks are poorly known at present.  
25 Here we used the most recent experimental data to investigate the relationship between RNA structure and  
26 protein interactions. Our results show that, independently of the particular technique, the amount of  
27 structure in RNA molecules correlates with the capacity of binding to proteins *in vitro* and *in vivo*. To  
28 validate this observation, we generated an *in vitro* network that mimics the composition of phase-separated  
29 RNA granules. We observed that RNA, when structured, competes with protein binding and can rearrange  
30 the interaction network. The simplicity of the principle bears great potential to boost the understanding and  
31 modelling of cellular processes involving RNA-protein interactions.

32

*N. Sanchez de Groot et al.*

## 33 INTRODUCTION

34

35 Since the central dogma was proposed in 1950, the main role attributed to RNA has been to be an  
36 intermediate between DNA and protein. Yet, more than 70% of the genome is transcribed and just a small  
37 part has been found to code for proteins<sup>1,2</sup>, which indicates that a major part could have unknown biological  
38 roles – if not only garbage. During the last decade many efforts have been made to develop procedures to  
39 study RNA isoforms: sequencing has been essential for detection of RNA species<sup>3</sup> and recent developments  
40 have provided a great deal of data on polymorphisms<sup>4</sup>, expression<sup>5</sup> and half-lives<sup>6</sup> of all types of RNAs,  
41 which is highly informative of cellular functions and regulation. More specifically, a number of techniques  
42 reported on biological characteristics such as cellular location<sup>7</sup> or secondary structure<sup>8</sup> and characterization  
43 of the RNA interaction network (proteins and nucleic acids) is one of the most urgent challenges<sup>9</sup>. In this  
44 context, computational methods are being developed to find patterns and understand features such as the  
45 structure that a transcript adopts<sup>10</sup> or to which partners are attracted<sup>11</sup>.

46

47 RNA is involved in many cellular processes such as control of gene expression, catalysis of substrates,  
48 binding of ligands, scaffold of complex assemblies<sup>12</sup> and molecular chaperoning<sup>13</sup>. Transcripts ability to  
49 act as a hub of cellular networks is at the centre of an active research field and has already led to the  
50 discovery of diverse ribonucleoprotein (RNP) assemblies<sup>14,15</sup>. A number of membrane-less organelles have  
51 been shown to contain specific mixtures of RNAs and RBPs that are difficult to characterize<sup>9</sup>. In most  
52 cases, the RNP assemblies (e.g. P-bodies, stress granules<sup>16</sup>) exchange elements with the surrounding  
53 content and adapt to the environmental condition in a very dynamic way. RNA plays a central role within  
54 these phase-separated condensates: whereas a peptide of 100 amino acids can bind one or two proteins, a  
55 chain of 100 nucleotides interacts with 5 - 20 proteins<sup>17</sup>. Not surprisingly, changes in the interactions within  
56 RNP granules are associated with the development of several human diseases, from neurological disorders  
57 to cancer<sup>18</sup>. Importantly, regulation of RNP contacts is controlled by molecular chaperones<sup>18</sup>, such as  
58 HSP70 that is a central remodelling element able to promote assembly and disassembly of RNP complexes  
59<sup>19</sup>.

60

61 In this large spectrum of activities, RNA structure dictates the precise binding of proteins by creating spatial  
62 patterns and alternative conformations and binding sites. Known complexes in which the structure of a  
63 transcript regulates protein binding include tRNAs whose three-dimensional conformation facilitates the  
64 codon/anticodon interaction<sup>20</sup> and the rRNA scaffold that sustains the ribosome<sup>21</sup>. Yet, structure is not  
65 crucial only for some specific RNAs and there are several cases of nucleotide chains that play scaffolding  
66 roles: snoRNAs, for instance, are highly structured and act as a chaperone for assembly of other transcripts  
67<sup>22</sup>. The secondary structure is particularly important for messenger RNAs (mRNAs) and defines the  
68 lifecycle<sup>23</sup>, recruitment of ribosomes and response against environmental changes<sup>23</sup>. Of both coding and  
69 non-coding transcripts, RNA-binding proteins (RBPs) are the major regulators<sup>24</sup> and are often classified as

*N. Sanchez de Groot et al.*

70 single-stranded RNA (ssRNA) or double-stranded RNA (dsRNA) depending on their binding preferences,  
71 although this categorization is approximate.

72

73 Here we computationally evaluated the relationship between RNA structure and ability to interact with  
74 proteins demonstrating a more general and influential impact than previously reported. We linked the  
75 secondary structure to the biological function of transcripts and investigated if RNAs of a specific type or  
76 with related roles have similar structural content. Our analysis reveals a tight relationship between  
77 properties of the transcripts and their protein partners. Based on these observations, we designed an  
78 experiment to evaluate the ability of a RNA to interfere the contact network of a protein complex. Overall,  
79 our results indicate that highly structured RNAs are able to favour formation of protein assembly and  
80 remodel contact networks like a chaperone.

81

82

83

84

*N. Sanchez de Groot et al.*

## 85 RESULTS

86

### 87 **Highly structured RNAs bind more and stronger**

88

89 With the aim of studying how the structure influences the binding of proteins, we compared human RNAs  
90 based on their secondary structure content<sup>8</sup>. In this analysis we selected the least (100 transcripts, called  
91 “LS” henceforth) and the most structured (100 transcripts, “HS”) RNAs revealed by parallel analysis of  
92 RNA structure (PARS)<sup>8</sup> (**Fig. 1a, Supplementary Table 1**). PARS is an experimental technique that  
93 distinguishes double- and single-stranded regions of RNA using the catalytic activity of two enzymes,  
94 RNase V1 (able to cut double-stranded nucleotides) and S1 (able to cut single-stranded nucleotides)<sup>8</sup>. We  
95 calculated the interactions of LS and HS sets using *catRAPID*<sup>25</sup>, an in-house algorithm that predicts the  
96 binding propensity of RBPs using physico-chemical properties (we here used 579 classic RBPs, as defined  
97 in<sup>11</sup>; see **Methods**). The interaction propensity distribution (Z-score) shows that protein contacts with HS  
98 RNAs are stronger than those with LS (**Fig. 1b and Supplementary Table 2**). Indeed, for 501 out of 579  
99 RBSs tested, the HS set has larger Z-score than the LS set (**Supplementary Table 2**). Respectively 34%  
100 and 18% of the HS and LS interactions show *catRAPID* Z-score > 0 (i.e., binding ability). Thus, our  
101 computational analysis suggest that the RNA structure content is important to interact with proteins.

102

103 To investigate whether the trend predicted by our algorithm is also observed at the experimental level, we  
104 analysed data coming from enhanced CrossLinking and ImmunoPrecipitation (eCLIP, see **Methods**),  
105 which is a technique revealing RBPs contacts on target RNAs at individual nucleotide resolution using  
106 ligation of barcoded single-stranded DNA adapters<sup>26</sup>. In great agreement with our predictions, we found  
107 that the amount of double-stranded structure of each transcript correlates with the strength of protein-RNA  
108 contacts (**Fig. 1c**). It is worth to mention that the eCLIP assays favour detection of single-stranded (SS)  
109 RNA at the expense of double-stranded (DS) RNA. Importantly, the eCLIP dataset is not enriched in  
110 double-stranded RNA-binding proteins (9 out of 118 are assigned according to UniProt as DS RNA binding,  
111 12 out of 118 as SS RNA binding, using GO annotations available<sup>27</sup>), which suggests that our results are  
112 not biased by the choice of proteins used in the analysis. To further corroborate our predictions, we found  
113 that 78 out of 118 proteins interact with the HS set and 1 out of 118 with the LS (**Supplementary Table**  
114 **1**). Transcripts in the LS set were found to bind between 0 and 1 binding proteins, while the HS showed a  
115 much larger span from 0 to 38 RBPs (**Fig. 1c**). We selected three sets of transcripts from the entire human  
116 transcriptome according to the protein-interacting potential as determined by eCLIP binding affinities and  
117 discovered that the propensity of RNAs to interact with proteins is proportional to the amount of RNA  
118 structure (**Fig. 1d**).

119

120 To corroborate that the observed trend is not only intrinsic to eCLIP or PARS experiments, we analysed  
121 the interactome of 8 large (>1000nt) RNAs whose protein partners have been revealed by microarray, a  
122 crosslinking-free approach<sup>28,29</sup> (see **Methods**). In parallel, we estimated the structural content of each

*N. Sanchez de Groot et al.*

123 transcript using the CROSS algorithm that was previously trained on SHAPE data<sup>30</sup> to predict the double  
124 stranded propensity at nucleotide level. Our results presented in **Fig. 1e** indicate that highly structured  
125 transcripts have more protein contacts than poorly structured transcripts, which is fully compatible with the  
126 findings presented in **Fig. 1b**.

127  
128 We further corroborated our observation by an accurate analysis of the ribonucleoprotein complexes  
129 deposited in the PDB database (X-ray resolution < 2 Å; **Supplementary Table 3**; see **Methods**), which  
130 comprise 196 distinct RNA-protein pairs analysed with different techniques (X-ray, NMR) and by different  
131 researchers. Measuring the amount of RNA intra- (i.e. amount of RNA structure) and inter-contacts (i.e.,  
132 amino acid) per nucleotide chain, we found a striking correlation of 0.78 between the two variables, which  
133 provides compelling evidence of their tight relation (**Fig. 1f**). Thus, independently of the experiment, the  
134 computational tool or the species we found a link between number and strength of protein interactions and  
135 RNA structural content.

### 136 137 **Highly structured RNAs tend to interact with proteins**

138  
139 The association that we describe here supports the existence of an RNA structure favouring the access to  
140 protein binding<sup>31,32</sup> (**Fig. 2a**). Literature cases supporting our observation include ribosomal RNA, for  
141 which there is a strong connection between structure and ability to scaffold protein interactions<sup>33,34</sup>.  
142 Following up on this case, we wondered whether other RNA types could exploit structural regions to  
143 regulate the function of other proteins. Intriguingly, we found that the HS set is exclusively populated by  
144 protein-coding transcripts, while the LS set contains different functional classes of RNAs, such as antisense  
145 RNAs or long intergenic non-coding RNAs (lincRNAs) (**Fig. 2b**). In agreement with this observation,  
146 protein-coding RNAs are indeed the group with the largest structural content at the transcriptome level  
147 (**Fig. 2c**)<sup>30</sup>. Perhaps unsurprisingly, messenger RNAs and other RNA types known to interact with proteins  
148 such as snRNAs<sup>35</sup> and tRNAs<sup>20</sup> show high amount of structure, whereas RNAs targeting complementary  
149 regions in nucleic acids such as antisense and lincRNAs<sup>36,37</sup> feature the smallest amounts of structure<sup>38</sup>  
150 (**Supplementary Table 4**). Indeed, the secondary structure of mRNAs controls the translation speed<sup>39</sup> and  
151 the large difference of the coding group (**Fig. 2c**) indicates an intrinsic functional diversity.

152  
153 To further investigate the functions associated to LS and HS sets we analysed the GO terms by cleverGO  
154<sup>27</sup>. The LS set, with almost 75% of non-coding sequences, was associated with very few annotations (the  
155 current classification mainly refers to coding genes) and no clustering was obtained. By contrast, several  
156 GO annotations of the HS set were retrieved and we obtained 319 terms with a Bonferroni p-value < 0.05  
157 (see **Methods**). The analysis of semantic similarity indicates 146 terms clustered with a p-value of 0.01  
158 (see **Methods**) (**Fig. 2d**) that can be clustered in three main groups, each covering more than a quarter of  
159 the entries: (i) Complex protein assembly (59/146), (ii) Regulation of immune response (42/146) and (iv)  
160 Nucleoside metabolic process (41/146). Intriguingly, GO terms associated with the proteins binding

*N. Sanchez de Groot et al.*

161 exclusively dsRNA (see **Methods**), are also associated with similar biological processes, such as nucleoside  
162 metabolic process and regulation of immune response (**Supplementary Fig. 1**).

163

164 Overall, our cluster analysis highlights that structured transcripts tend to interact more with polypeptides  
165 and code for proteins involved in the formation of complex contact networks, such as ‘protein complex  
166 assembly’. Accordingly, the four biological processes that involve RNA molecules interacting with proteins  
167 are: structural, hub, scaffolding and substrate. Given the relationship between RNA structure and protein  
168 interactions (**Fig. 1**), one interpretation of our results is that a high degree of control is required for genes  
169 that coordinate the activity of a large number of cellular networks<sup>40</sup>. Thus, the analysis suggests a  
170 ‘recursive’ property: highly-contacted transcripts code for highly-contacting proteins, which indicates a  
171 tight level of cellular regulation<sup>12,41</sup>.

172

### 173 **Disorder and alpha helix distinguish between double and single stranded RNA**

174

175 To better understand the molecular basis for the structure-driven interactivity between proteins and RNAs,  
176 we analyzed the physico-chemical and structural parameters that allow to separate the HS and LS sets in  
177 the *catRAPID* algorithm<sup>11,25</sup>. We removed each individual parameter to estimate the impact on prediction  
178 of RNA-protein associations and found that the capacity to distinguish between protein binding to HS and  
179 LS RNAs is significantly reduced when the polarity ( $p=0.205$ ) and alpha helical ( $p=0.184$ ) properties were  
180 excluded (**Fig. 2e**, **Supplementary Table 5**). The property that more significantly affects the HS binding  
181 strength is polarity, which is enriched in disordered proteins<sup>42</sup> and anti-correlates with hydrophobicity  
182 (**Supplementary Table 6**) that is the most important force involved in the formation of molecular  
183 interactions<sup>43</sup>. As for the alpha helical propensity, we note that helices are the most frequent structural  
184 elements involved in the formation of contacts with double-stranded regions and occur in dsRBD and Zinc  
185 fingers<sup>24</sup> (**Supplementary Table 7**). This observation suggests co-evolution: while the RNA adopts  
186 complex shapes to expose binding regions, proteins increase their structural content. Thus, in agreement  
187 with the key lock theory, evolution have selected highly structured proteins as better interactors of double  
188 stranded RNAs<sup>44</sup>.

189

190 We validated the importance of protein polarity and helical structure by comparing three datasets of well-  
191 studied RBPs<sup>45-47</sup> retrieved from UniProt as exclusively single-stranded (ssRNA, 453 proteins) or double-  
192 stranded RNA (dsRNA, 390 proteins) binders (**Supplementary Table 7**). Analysis of biophysical  
193 properties with the *cleverMachine* approach<sup>48</sup> revealed that ssRNA binders and dsRNA binders are  
194 different for two properties: disorder and alpha-helix content (**Fig. 2f**). The comparison of the two sets, one  
195 against the other, indicate that RBPs binding to highly structured RNAs are structured and hydrophobic,  
196 while disordered and polar RBPs bind less structured RNAs (**Supplementary Fig. 2**). This analysis further  
197 expands what was previously reported for protein-protein networks, in which disordered regions play a  
198 central role<sup>40</sup>, and identifies new rules for nucleotide base pairing with amino-acids.

*N. Sanchez de Groot et al.*

199

200 **Molecular chaperones: an example of relationship between RNA structure content and protein**  
201 **contacts**

202

203 Our analysis of the human transcriptome and across organisms indicate that highly structured RNAs are  
204 prone to interact with proteins and, in turn, code for proteins involved in biological processes with large  
205 and complex contact networks. To better investigate the structure-driven protein interactivity of RNA  
206 molecules, we focused on a class of transcripts coding for proteins interacting with a large number of  
207 partners. The natural choice for our analysis is represented by molecular chaperones, as they promote  
208 folding into the native state<sup>49</sup> and organize the assembly of ribonucleoprotein granules<sup>50</sup>, thus fulfilling  
209 the ‘recursive’ property presented in **Fig. 2d**. eCLIP data<sup>26</sup> show that most of the RNAs coding for human  
210 chaperones are involved in interactions with multiple proteins (**Fig. 3a**). Confirming our hypothesis, we  
211 found a significant correlation between the protein-RNA interactions and the number of protein-protein  
212 interactions annotated in BioGRID (**Fig. 3b**). This result confirms that the transcripts bound by many RBPs  
213 code for highly-contacted proteins.

214

215 To understand if the correlation between protein-protein and protein-RNA interactions is a general property  
216 or just associated with the chaperone family, we analysed interactions of three RNA classes: RNAs with no  
217 structure (PARS content = 0), top 100 transcripts from PARS, and RNAs coding for chaperone proteins  
218 (HSP) (**Fig. 3c**). The cumulative distribution of protein-protein contacts shows a significant difference  
219 between the “no structure” RNAs (very few interactions reported, in agreement with the results shown in  
220 **Fig. 1d**) and “top structure” RNAs (many interactions reported). The HSP transcripts have a distribution  
221 similar to the “top structure” ones. Thus, our calculations agree with the GO analyses (**Fig. 2d**) and suggest  
222 a relationship between mRNA and their coding partners: highly structured RNAs code for highly interacting  
223 proteins.

224

225 The data presented so far suggest that RNAs related either by type (e.g. miRNA, snRNA) or function (e.g.  
226 coding for chaperones) share similar structural characteristics (**Fig. 2**). Thus, we should be able to estimate  
227 differences in the interaction network of two unrelated transcripts by analysing their structural content, and  
228 *vice versa*. To test this hypothesis, we selected the transcript of HSP70: highly structured (~51% according  
229 to PARS, **Fig. 3d** and **Fig. 3e**, also with CROSS, **Supplementary Fig. 3**) and coding for a chaperone  
230 essential to regulate protein complex assemblies such as clathrin coats<sup>51</sup> and stress granules<sup>19,50</sup>. As a  
231 control we chose the transcript coding for Braf: less structured (~20% according to PARS, **Fig. 3d** and **3e**,  
232 also with CROSS, **Supplementary Fig. 3**) and encoding for an oncogene involved in transmission of  
233 chemical signals from outside the cell to the nucleus. Although there is a significant overlap between HSP70  
234 and Braf interactions (**Fig. 3f**), HSP70 has more partners (30 RBPs identified by eCLIP) than Braf (9  
235 eCLIP RBPs), which is perfectly in agreement with the structure-driven protein interactivity property.

236



*N. Sanchez de Groot et al.*

237 In keeping with the trend in **Fig. 1b**, *cat*RAPID predictions show that HSP70 transcript performs stronger  
238 contacts than BRaf (**Fig. 3g**). Intriguingly, HSP70, as a highly structured RNA, codes for a protein with a  
239 higher number of interactors (244 BioGRID physical interactors) while BRaf is less structured and has a  
240 protein product binding to a smaller set of molecules (88 BioGRID physical interactors). These data suggest  
241 that an RNA with higher interactive capacity is predisposed to act as a network regulator: we can speculate  
242 that, because of its higher interactivity, HSP70 transcript could even perform a chaperone role depending  
243 on the context.

244

245 Our analysis suggests that a structured RNA, due to its higher protein-interacting potential, should affect  
246 protein interaction networks more than a less structured RNA. To validate this hypothesis, we used a  
247 chemical compound, biotinylated isoxazole (b-isox), to induce formation of a granule-like protein assembly  
248<sup>52,53</sup> and incubated it with BRaf (from now LS RNA) and HSP70 (from now HS RNA) transcripts (**Fig. 4a**).  
249 We observed that the HS RNA altered the composition of the granule-like more than the LS RNA (**Fig. 4b**  
250 and **Supplementary Table 8**). A statistically significant change of concentration was determined for 29  
251 proteins ('released' set) when HS RNA was added, but only for 9 with LS RNA. Clustering of the  
252 significantly changed proteins revealed that the composition in the presence of LS RNA remains similar  
253 that of the background control ('static' set; **Fig. 4c**). The competition of RNA with the b-isox precipitate  
254 contact network<sup>52,53</sup> could be direct or indirect (**Supplementary Fig. 4**). Yet, *cat*RAPID predictions support  
255 that this disruption is caused by a direct effect: as a decrease in the experimental stringency is associated  
256 with a drop in predictive power (**Fig. 4d**; see **Methods**). Moreover, analysis of eCLIP data indicates a  
257 higher number of contacts for the released proteins than for the static one. In agreement with our theoretical  
258 analysis the HS RNA-released proteins turned out to be significantly more polar (**Fig. 4e**).

259

260 Overall, this experimental example demonstrates that the "recursive" trend is evolutionarily preserved and  
261 influences every level of RNA biology, from global interactome to single molecule function (**Fig. 5**).

262

263

*N. Sanchez de Groot et al.*

264 **DISCUSSION**

265

266 RNA is often relegated to a secondary position with respect to proteins that are the major effectors of all  
267 cellular activities. However, thanks to recent experiments, it has been possible to collect information on the  
268 majority of transcripts in the cell. These advances generate big amounts of data and are revealing new  
269 functions<sup>9,29</sup>. There are many questions to be addressed at molecular level to understand the full picture of  
270 RNA roles.

271

272 Here we focused on the relationship between RNA secondary structure and ability to interact with proteins.  
273 It is widely accepted that the structure of a molecule determines all aspects of its life, from stability to  
274 function<sup>9</sup>. Yet, to the best of our knowledge, we are the first to show, at a transcriptome level, that the  
275 strength of protein interaction is correlated with the amount of RNA structure. We demonstrated the solidity  
276 of this principle by the analysis of crystal structures, protein micro-arrays and eCLIP data but also designing  
277 a new experimental approach. However, this observation is not completely unexpected, since lack of RNA  
278 structure is linked to more flexible and variable conformations and, thus, a shorter residence of a specific  
279 protein to a certain region. By contrast, presence of a native fold favours the formation of stable and well  
280 defined binding site that promote functional roles and, in turn, evolutionary selection. In addition, our  
281 finding agrees with the nucleotide ‘accessibility’ hypothesis defined as the probability of a protein to find  
282 its RNA motif<sup>31,32</sup>. Overall, our observation identifies an intrinsic property associated to the RNA molecule  
283 that could have been exploited through to regulate the interactions between transcripts and proteins.

284

285 For many RNAs (e.g., rRNA) the structure is functionally important and therefore subjected to evolutionary  
286 selection<sup>8</sup>. The correlation shown in our work indicates that structure is particularly relevant for coding  
287 RNAs and suggest an extra layer of regulation that links RNA to the protein product<sup>12,41</sup>. Something similar  
288 has been previously observed in plants<sup>54</sup> for which the transcripts with high conserved secondary structure  
289 are enriched in regulatory processes in the same way as we observed for the GO ontology of the highly  
290 structured RNAs. Indeed, we observed a link between the number of protein contacts of the transcripts and  
291 the participation of the encoded protein in a large network of interactions, revealing an important level of  
292 transcriptional regulation<sup>29</sup> for these highly connected proteins<sup>40</sup>. For the chaperone family the number of  
293 contacts formed by the mRNAs correlates with the contacts formed by the coded proteins.

294

295 We used a simple experimental approach to prove the relevance of RNA structure on the interaction with  
296 proteins and the functionality associated to this property. Our experiment demonstrated that a highly  
297 structured RNA, in this case the transcript coding for HSP70, is able to transform the contact network of a  
298 macromolecular complex assembly by competing with the pre-existent interactions. The main effect  
299 observed was the release of proteins from the aggregated assembly, proteins computationally and  
300 experimentally tested to be proper interactors of the HSP70 mRNA. Our finding is in agreement with  
301 previous reports indicating that RNAs are involved in RBPs assembly<sup>55</sup>. Ribosomes, for instance, are

*N. Sanchez de Groot et al.*

302 known as powerful co-factors that aid in the folding of polypeptide chains as they emerge from their channel  
303 <sup>13</sup>. On the one hand, RNA molecules can be regarded as chaperones assisting the assembly of proteins. On  
304 the other hand, RNA molecules are continuously handed off from one protein to another. After splicing,  
305 RNAs are escorted to the cytoplasm by proteins and delivered to the ribosome for translation. Evidence for  
306 the passage of proteins from one chaperone to another during folding provides a conceptual precedent for  
307 a chaperone action of proteins on RNA molecules<sup>56</sup>. Thus, there is a mutual chaperoning effect of proteins  
308 on RNA and RNA on proteins, which is likely the result of the co-evolution between the two molecules<sup>57</sup>.  
309 Our data suggest an intriguing activity of the HSP70 transcript as a chaperone and a connection between  
310 RNA and protein activities. Intriguingly, while the role of HSP70 protein as a protein chaperone is well  
311 documented and there are numerous reports on its binding to hydrophobic peptide domains to prevent  
312 aggregation and facilitate protein folding<sup>58</sup>, very little is known about the property of its messenger RNA.  
313

314 In the future kinetic analyses tracking the RNA-protein association will be needed to further elucidate to  
315 which extent protein partners actively contribute to RNA structure formation. Our findings are reminiscent  
316 of the famous lock-and-key model in the field of enzymology<sup>44</sup>: the structure of both, enzyme and its  
317 substrate, are key determinants of their association. Yet, structure contributions are not trivial in the case of  
318 ribonucleoprotein associations because the combination of different nucleotides bears an obvious  
319 specificity-determining potential. While unfolded regions promote for protein-protein assembly and  
320 disordered proteins exploit short motifs to ensure high connectivity<sup>59</sup>, the reduced nucleotide alphabet and  
321 its complementarity suggest that nature favors structure to connect RNAs with proteins. The observations  
322 presented here, from transcriptome to single molecule, indicate that RNA is involved in multiple levels of  
323 regulation. The complexity and diversity of protein-RNA networks reported open the avenue for the  
324 investigation of new regulatory processes.

325

326

*N. Sanchez de Groot et al.*

327 **ACKNOWLEDGEMENTS**

328

329 We thank all members of the Tartaglia's, Vabula's laboratory, Dr Edoardo Milanetti for the analysis of  
330 crystal structures and Dr Danny Incarnato for insights into high-throughput approaches.

331

332 The research leading to these results has been supported by European Research Council  
333 (RIBOMYLOME\_309545 to GGT and METAMETA\_311522 to RMV), Spanish Ministry of Economy  
334 and Competitiveness (BFU2014-55054-P and BFU2017-86970-P) and “Fundació La Marató de TV3”  
335 (PI043296). We acknowledge support of the Spanish Ministry of Economy and Competitiveness, ‘Centro  
336 de Excelencia Severo Ochoa 2013-2017’. We acknowledge the support of the CERCA Programme /  
337 Generalitat de Catalunya. Support of Spanish Ministry for Science and Competitiveness (MINECO) to the  
338 EMBL partnership.

339

340

341 **Author contributions**

342

343 GGT and conceived the study together with the help of NSDG and RMV, AA performed the calculations,  
344 MA and GC performed and analyzed the mass-spectrometry the experiments. NSDG, RCM, GGT and AA  
345 analyzed the data. NSDG, RMV and GGT wrote the manuscript.

346

347 **Conflict of interest**

348 The authors declare no conflict of interest.

349

350

351 **References**

352

- 353 1 Vandivier, L. E., Anderson, S. J., Foley, S. W. & Gregory, B. D. The Conservation and Function of RNA Secondary Structure in Plants. *Annu Rev Plant Biol* **67**, 463-488, doi:10.1146/annurev-arplant-043015-111754 (2016).
- 354
- 355 2 Kashi, K., Henderson, L., Bonetti, A. & Carninci, P. Discovery and functional analysis of lncRNAs: Methodologies to investigate an uncharacterized transcriptome. *Biochim Biophys Acta* **1859**, 3-15, doi:10.1016/j.bbagr.2015.10.010 (2016).
- 356
- 357 3 Okazaki, Y. et al. Analysis of the mouse transcriptome based on functional annotation of 60,770 full-length cDNAs. *Nature* **420**, 563-573, doi:10.1038/nature01266 (2002).
- 358
- 359 4 Quinn, E. M. et al. Development of strategies for SNP detection in RNA-seq data: application to lymphoblastoid cell lines and evaluation using 1000 Genomes data. *PLoS One* **8**, e58815, doi:10.1371/journal.pone.0058815 (2013).
- 360
- 361 5 Djebali, S. et al. Landscape of transcription in human cells. *Nature* **489**, 101-108, doi:10.1038/nature11233 (2012).
- 362
- 363 6 Tani, H. et al. Genome-wide determination of RNA stability reveals hundreds of short-lived noncoding transcripts in mammals. *Genome Res* **22**, 947-956, doi:10.1101/gr.130559.111 (2012).
- 364
- 365 7 Tripathi, V. et al. The nuclear-retained noncoding RNA MALAT1 regulates alternative splicing by modulating SR splicing factor phosphorylation. *Mol Cell* **39**, 925-938, doi:10.1016/j.molcel.2010.08.011 (2010).
- 366
- 367 8 Wan, Y. et al. Landscape and variation of RNA secondary structure across the human transcriptome. *Nature* **505**, 706-709, doi:10.1038/nature12946 (2014).
- 368
- 369 9 Marchese, D., de Groot, N. S., Lorenzo Gotor, N., Livi, C. M. & Tartaglia, G. G. Advances in the characterization of RNA-binding proteins. *Wiley Interdiscip Rev RNA* **7**, 793-810, doi:10.1002/wrna.1378 (2016).
- 370
- 371 10 Lorenz, R., Luntzer, D., Hofacker, I. L., Stadler, P. F. & Wolfinger, M. T. SHAPE directed RNA folding. *Bioinformatics* **32**, 145-147, doi:10.1093/bioinformatics/btv523 (2016).
- 372
- 373 11 Bellucci, M., Agostini, F., Masin, M. & Tartaglia, G. G. Predicting protein associations with long noncoding RNAs. *Nat Methods* **8**, 444-445, doi:10.1038/nmeth.1611 (2011).
- 374
- 375 12 Ribeiro, D. M. et al. Protein complex scaffolding predicted as a prevalent function of long non-coding RNAs. *Nucleic Acids Res* **46**, 917-928, doi:10.1093/nar/gkx1169 (2018).
- 376
- 377 13 Choi, S. I., Ryu, K. & Seong, B. L. RNA-mediated chaperone type for de novo protein folding. *RNA Biol* **6**, 21-24 (2009).
- 378
- 379 14 Maharana, S. et al. RNA buffers the phase separation behavior of prion-like RNA binding proteins. *Science*, doi:10.1126/science.aar7366 (2018).
- 380
- 381 15 Franzmann, T. M. et al. Phase separation of a yeast prion protein promotes cellular fitness. *Science* **359**, doi:10.1126/science.aao5654 (2018).
- 382
- 383 16 Van Treeck, B. et al. RNA self-assembly contributes to stress granule formation and defining the stress granule transcriptome. *Proc Natl Acad Sci U S A* **115**, 2734-2739, doi:10.1073/pnas.1800038115 (2018).
- 384
- 385 17 Chujo, T., Yamazaki, T. & Hirose, T. Architectural RNAs (arcRNAs): A class of long noncoding RNAs that function as the scaffold of nuclear bodies. *Biochim Biophys Acta* **1859**, 139-146, doi:10.1016/j.bbagr.2015.05.007 (2016).
- 386
- 387 18 Alberti, S. & Carra, S. Quality control of membraneless organelles. *J Mol Biol*, doi:10.1016/j.jmb.2018.05.013 (2018).
- 388
- 389 19 Ganassi, M. et al. A Surveillance Function of the HSPB8-BAG3-HSP70 Chaperone Complex Ensures Stress Granule Integrity and Dynamism. *Mol Cell* **63**, 796-810, doi:10.1016/j.molcel.2016.07.021 (2016).
- 390
- 391 20 Bhaskaran, H., Rodriguez-Hernandez, A. & Perona, J. J. Kinetics of tRNA folding monitored by aminoacylation. *RNA* **18**, 569-580, doi:10.1261/rna.030080.111 (2012).
- 392
- 393 21 Ramakrishnan, V. The ribosome emerges from a black box. *Cell* **159**, 979-984, doi:10.1016/j.cell.2014.10.052 (2014).
- 394
- 395 22 Lestrade, L. & Weber, M. J. snoRNA-LBME-db, a comprehensive database of human H/ACA and C/D box snoRNAs. *Nucleic Acids Res* **34**, D158-162, doi:10.1093/nar/gkj002 (2006).
- 396
- 397 23 Goodarzi, H. et al. Systematic discovery of structural elements governing stability of mammalian messenger RNAs. *Nature* **485**, 264-268, doi:10.1038/nature11013 (2012).
- 398
- 399
- 400
- 401
- 402
- 403
- 404
- 405
- 406

*N. Sanchez de Groot et al.*

- 407 24 Lunde, B. M., Moore, C. & Varani, G. RNA-binding proteins: modular design for efficient  
408 function. *Nat Rev Mol Cell Biol* **8**, 479-490, doi:10.1038/nrm2178 (2007).
- 409 25 Agostini, F. *et al.* catRAPID omics: a web server for large-scale prediction of protein-RNA  
410 interactions. *Bioinformatics* **29**, 2928-2930, doi:10.1093/bioinformatics/btt495 (2013).
- 411 26 Van Nostrand, E. L. *et al.* Robust transcriptome-wide discovery of RNA-binding protein binding  
412 sites with enhanced CLIP (eCLIP). *Nat Methods* **13**, 508-514, doi:10.1038/nmeth.3810 (2016).
- 413 27 Klus, P., Ponti, R. D., Livi, C. M. & Tartaglia, G. G. Protein aggregation, structural disorder and  
414 RNA-binding ability: a new approach for physico-chemical and gene ontology classification of  
415 multiple datasets. *BMC Genomics* **16**, 1071, doi:10.1186/s12864-015-2280-z (2015).
- 416 28 Siprashvili, Z., Webster, D. E., Kretz, M., Johnston, D., Rinn, J. L., Chang, H. Y., & Khavari, P.  
417 A. . Identification of proteins binding coding and non-coding human RNAs using protein  
418 microarrays. *BMC Genomics* **13**, 633 (2012).
- 419 29 Marchese, D. *et al.* Discovering the 3' UTR-mediated regulation of alpha-synuclein. *Nucleic Acids*  
420 *Res* **45**, 12888-12903, doi:10.1093/nar/gkx1048 (2017).
- 421 30 Delli Ponti, R., Marti, S., Armaos, A. & Tartaglia, G. G. A high-throughput approach to profile  
422 RNA structure. *Nucleic Acids Res* **45**, e35, doi:10.1093/nar/gkw1094 (2017).
- 423 31 Li, X., Kazan, H., Lipshitz, H. D. & Morris, Q. D. Finding the target sites of RNA-binding proteins.  
424 *Wiley Interdiscip Rev RNA* **5**, 111-130, doi:10.1002/wrna.1201 (2014).
- 425 32 Hackermuller, J., Meisner, N. C., Auer, M., Jaritz, M. & Stadler, P. F. The effect of RNA secondary  
426 structures on RNA-ligand binding and the modifier RNA mechanism: a quantitative model. *Gene*  
427 **345**, 3-12, doi:10.1016/j.gene.2004.11.043 (2005).
- 428 33 Khatter, H., Myasnikov, A. G., Natchiar, S. K. & Klaholz, B. P. Structure of the human 80S  
429 ribosome. *Nature* **520**, 640-645, doi:10.1038/nature14427 (2015).
- 430 34 Li, F. *et al.* Regulatory impact of RNA secondary structure across the Arabidopsis transcriptome.  
431 *Plant Cell* **24**, 4346-4359, doi:10.1105/tpc.112.104232 (2012).
- 432 35 Madhani, H. D. snRNA catalysts in the spliceosome's ancient core. *Cell* **155**, 1213-1215,  
433 doi:10.1016/j.cell.2013.11.022 (2013).
- 434 36 Chapman, E. J. & Carrington, J. C. Specialization and evolution of endogenous small RNA  
435 pathways. *Nat Rev Genet* **8**, 884-896, doi:10.1038/nrg2179 (2007).
- 436 37 Carthew, R. W. & Sontheimer, E. J. Origins and Mechanisms of miRNAs and siRNAs. *Cell* **136**,  
437 642-655, doi:10.1016/j.cell.2009.01.035 (2009).
- 438 38 Yang, J. R. & Zhang, J. Human long noncoding RNAs are substantially less folded than messenger  
439 RNAs. *Mol Biol Evol* **32**, 970-977, doi:10.1093/molbev/msu402 (2015).
- 440 39 Faure, G., Ogurtsov, A. Y., Shabalina, S. A. & Koonin, E. V. Role of mRNA structure in the control  
441 of protein folding. *Nucleic Acids Res* **44**, 10898-10911, doi:10.1093/nar/gkw671 (2016).
- 442 40 Gsponer, J. & Babu, M. M. Cellular strategies for regulating functional and nonfunctional protein  
443 aggregation. *Cell Rep* **2**, 1425-1437, doi:10.1016/j.celrep.2012.09.036 (2012).
- 444 41 Zanzoni, A. *et al.* Principles of self-organization in biological pathways: a hypothesis on the  
445 autogenous association of alpha-synuclein. *Nucleic Acids Res* **41**, 9987-9998,  
446 doi:10.1093/nar/gkt794 (2013).
- 447 42 Wong, E. T., Na, D. & Gsponer, J. On the importance of polar interactions for complexes  
448 containing intrinsically disordered proteins. *PLoS Comput Biol* **9**, e1003192,  
449 doi:10.1371/journal.pcbi.1003192 (2013).
- 450 43 Tartaglia, G. G. & Vendruscolo, M. Proteome-level interplay between folding and aggregation  
451 propensities of proteins. *J Mol Biol* **402**, 919-928, doi:10.1016/j.jmb.2010.08.013 (2010).
- 452 44 Jr., D. E. K. The Key-Lock Theory and the Induced Fit Theory. *Angewandte Chemie International*  
453 *Edition* **33**, 2375-2378 (1995).
- 454 45 Castello, A. *et al.* Comprehensive Identification of RNA-Binding Proteins by RNA Interactome  
455 Capture. *Methods Mol Biol* **1358**, 131-139, doi:10.1007/978-1-4939-3067-8\_8 (2016).
- 456 46 Brannan, K. W. *et al.* SONAR Discovers RNA-Binding Proteins from Analysis of Large-Scale  
457 Protein-Protein Interactomes. *Mol Cell* **64**, 282-293, doi:10.1016/j.molcel.2016.09.003 (2016).
- 458 47 Gerstberger, S., Hafner, M. & Tuschl, T. A census of human RNA-binding proteins. *Nat Rev Genet*  
459 **15**, 829-845, doi:10.1038/nrg3813 (2014).
- 460 48 Klus, P. *et al.* The cleverSuite approach for protein characterization: predictions of structural  
461 properties, solubility, chaperone requirements and RNA-binding abilities. *Bioinformatics* **30**, 1601-  
462 1608, doi:10.1093/bioinformatics/btu074 (2014).



*N. Sanchez de Groot et al.*

- 463 49 Kim, Y. E., Hipp, M. S., Bracher, A., Hayer-Hartl, M. & Hartl, F. U. Molecular chaperone functions  
464 in protein folding and proteostasis. *Annu Rev Biochem* **82**, 323-355, doi:10.1146/annurev-biochem-  
465 060208-092442 (2013).
- 466 50 Mateju, D. *et al.* An aberrant phase transition of stress granules triggered by misfolded protein and  
467 prevented by chaperone function. *EMBO J* **36**, 1669-1687, doi:10.15252/embj.201695957 (2017).
- 468 51 Sousa, R. *et al.* Clathrin-coat disassembly illuminates the mechanisms of Hsp70 force generation.  
469 *Nat Struct Mol Biol* **23**, 821-829, doi:10.1038/nsmb.3272 (2016).
- 470 52 Kato, M. *et al.* Cell-free formation of RNA granules: low complexity sequence domains form  
471 dynamic fibers within hydrogels. *Cell* **149**, 753-767, doi:10.1016/j.cell.2012.04.017 (2012).
- 472 53 Han, T. W. *et al.* Cell-free formation of RNA granules: bound RNAs identify features and  
473 components of cellular assemblies. *Cell* **149**, 768-779, doi:10.1016/j.cell.2012.04.016 (2012).
- 474 54 Deng, H. *et al.* Rice In Vivo RNA Structurome Reveals RNA Secondary Structure Conservation  
475 and Divergence in Plants. *Mol Plant* **11**, 607-622, doi:10.1016/j.molp.2018.01.008 (2018).
- 476 55 Horowitz, S. & Bardwell, J. C. RNAs as chaperones. *RNA Biol* **13**, 1228-1231,  
477 doi:10.1080/15476286.2016.1247147 (2016).
- 478 56 Herschlag, D. RNA chaperones and the RNA folding problem. *J Biol Chem* **270**, 20871-20874  
479 (1995).
- 480 57 Chao, J. A., Patskovsky, Y., Almo, S. C. & Singer, R. H. Structural basis for the coevolution of a  
481 viral RNA-protein complex. *Nat Struct Mol Biol* **15**, 103-105, doi:10.1038/nsmb1327 (2008).
- 482 58 Tartaglia, G. G., Dobson, C. M., Hartl, F. U. & Vendruscolo, M. Physicochemical determinants of  
483 chaperone requirements. *J Mol Biol* **400**, 579-588, doi:10.1016/j.jmb.2010.03.066 (2010).
- 484 59 Tompa, P., Davey, N. E., Gibson, T. J. & Babu, M. M. A million peptide motifs for the molecular  
485 biologist. *Mol Cell* **55**, 161-169, doi:10.1016/j.molcel.2014.05.032 (2014).
- 486 60 Kertesz, M. *et al.* Genome-wide measurement of RNA secondary structure in yeast. *Nature* **467**,  
487 103-107, doi:10.1038/nature09322 (2010).

488

N. Sanchez de Groot et al.

489

490 **Figure legends**

491

492 **Figure 1. The amount of protein structure correlates with the number of interactions.** a) Distribution  
493 of the secondary structure content of human RNA measured by PARS<sup>8,60</sup>. Vertical lines indicate the top  
494 10% cases with the lowest secondary content (LS; blue) and the bottom 10% with the highest secondary  
495 content (HS; pink). b) Distribution of the *cat*RAPID scores for all possible interactions with 579 canonical  
496 RBPs and transcripts with lowest and highest secondary structure content (LS and HS), respectively<sup>11,25</sup>. c)  
497 Distribution of RNAs according to their interactions with proteins as measured by eCLIP (empirical p-  
498 value of the separation is  $6.1 \cdot 10^{-3}$ )<sup>26</sup>. The high and low structured RNAs for (A) are mapped as pink and  
499 blue dots respectively. d) Violin plots showing the distribution of the PARS structural content of three  
500 groups of RBPs divided by their eCLIP binding score. High, medium and low number of RNA-protein  
501 contacts are color-coded as pink, orange and blue, respectively (see **Methods**). e) Correlation between  
502 structural content (CROSS predictions of icSHAPE experiments) and protein interactions of 8 transcripts  
503 revealed by protein microarrays (0.76; Pearson's correlation). f) Analysis of crystals containing protein-  
504 RNA complexes reveals a trend between inter and intra-contacts of RNA chains. 196 different RNA-protein  
505 pairs analysed with different techniques and by different researchers.

506

507 **Figure 2. Functional footprints of the RNA structure-driven protein interactivity.** a) Scheme showing  
508 the role of intra and intermolecular contacts in a RNA-protein complex. Top, intra-molecular contacts.  
509 Ribbon representation with red zones indicating the cores that sustain tertiary structures or local domains.  
510 Bottom, inter-molecular contacts. The simplified diagram highlights the main role: intra-molecular, sustain  
511 structures; inter-molecular, join functional elements. Contact strength, from dark blue (lowest) to red  
512 (highest). b) Fraction of transcripts corresponding to different RNA types according to PARS  
513 measurements<sup>8,60</sup>: Left (HS) and right (LS) are the 100 transcripts with the highest and lowest secondary  
514 content, respectively. c) PARS structural content distribution in different RNA types (Ensembl  
515 classification). d) Semantic grouping of gene ontology terms associated to the HS. e) Changes in *cat*RAPID  
516 interaction propensities caused by removing the alpha-helix and polarity (correlating with disorder  
517 propensity, **Supplementary Table 6**) contributions abrogate the ability to distinguish between HS and LS  
518 <sup>11,25</sup>. f) *multiclever*Machine analysis of the physico-chemical properties of three different data bases of RBPs  
519 and the set of proteins annotated in UniProt as binders of double stranded RNAs (DS) or single stranded  
520 RNAs (SS) (see **Methods**). “Disorder propensity” and “Alpha helix” are the properties showing significant  
521 difference and opposite results between DS and SS binders for at least two RBP databases (green or red  
522 indicate that DS or SS are enriched or depleted; yellow indicates no significant differences between the  
523 sets).

524

525 **Figure 3. Molecular chaperones: an example of relationship between RNA structure content and**  
526 **protein contacts.** a) Distribution of the fraction of proteins binding to RNAs for chaperones, as measured



*N. Sanchez de Groot et al.*

527 by eCLIP<sup>26</sup>. The transcripts coding for chaperone are represented as dots blue and pink accordingly to their  
528 structural content (blue for low and pink for high, respectively). Kolmogorov Smirnov (KS0 test p-value  
529 between blue and pink dots  $p = 4 \cdot 10^{-7}$ . **b**) Correlation between protein contacts of RNA coding for  
530 chaperones, measured with eCLIP<sup>26</sup>, and physical interactions of the corresponding proteins, collected  
531 from BioGRID. **c**) Empirical cumulative distribution function of number of physical interactors retrieved  
532 from BioGRID for three different protein sets: blue - protein products of transcripts with a PARS structural  
533 content equal to 0<sup>8,60</sup>; pink - proteins coded by transcripts with highest secondary content measured by  
534 PARS; grey - proteins corresponding to the chaperone family. blue, n=2142; red n=150; HSPs, n=31. **d**)  
535 PARS measurement of the secondary structure content of HS RNA (HSP70) and LS RNA (BRaf)  
536 transcripts. **e**) Boxplot distribution of the PARS the secondary structure content. **f**) Venn diagram showing  
537 the overlap (empirical p-value  $p < 6 \cdot 10^{-3}$  computed on all the 100 eCLIP RBPs as background) between  
538 protein interactions of HSP70 and BRaf RNA. **g**) Prediction of protein binding affinity of HS RNA (HSP70)  
539 and LS RNA (BRaf) transcripts using *catRAPID*<sup>11,25</sup>.

540

541 **Figure 4. Structured RNA competes with the amyloid-like scaffold for association with cellular**  
542 **proteins *in vitro*.** **a**) B-isox-driven aggregation of HeLa protein lysate *in vitro*. Left, coomassie-stained  
543 gels, one representative experiment shown. Center, aggregated protein intensity was quantified and the  
544 difference evaluated using two tailed t-test ( $p = 1 \cdot 10^{-3}$ ; N=4 biological replicates). Right, experimental  
545 scheme. **b**) Volcano plots indicating the p-values (Perseus measure) of the individual protein enrichments  
546 in the b-isox assembly (N=4 independent biological replicates). The statistical significance threshold is  
547 marked by a horizontal line (see also **Supplementary Table 8**). **c**) Color-coded LFQ intensities of proteins  
548 affected by the HS RNA on a scale from black (low) to red (high). Hierarchical clustering by Perseus is  
549 indicated. For comparison, the LFQ intensities of the same proteins in control and in the presence of the LS  
550 RNA are plotted as well. **d**) *catRAPID* predictions for positive and negative protein sets from the b-isox/HS  
551 RNA sample. **e**) Box plot of polarity distributions of proteins rescued or unaffected by the HS RNA (black  
552 or grey dots, respectively), corresponding to the right panel of **Fig. 4b** ( $p = 4.7 \cdot 10^{-2}$ , KS statistical test).

553

554 **Figure 5. The impact of the structure-driven protein interactivity.** We studied the relationship between  
555 RNA secondary structure and ability to interact with proteins demonstrating that the interaction strength  
556 correlates with the amount of RNA structure. This property, which we called the structure-driven protein  
557 interactivity, impacts every aspect of RNA life. At the interactome level, we observed that the RNA  
558 structural content defines the number of protein contacts (see **Fig. 1**). Our analysis pointed out that RNAs  
559 functionally related have similar structural content, supporting the functional impact of the structure (see  
560 **Fig. 2**). Analyzing individual RNAs we found that the structural content is linked to the number of partners  
561 as well as the function that an RNA is able to undertake (e.g. chaperoning) (see **Fig. 3** and **Fig. 4**). The  
562 structure-driven protein interactivity is an intrinsic property associated with the RNA molecule that can be  
563 traced at any regulatory level.

564

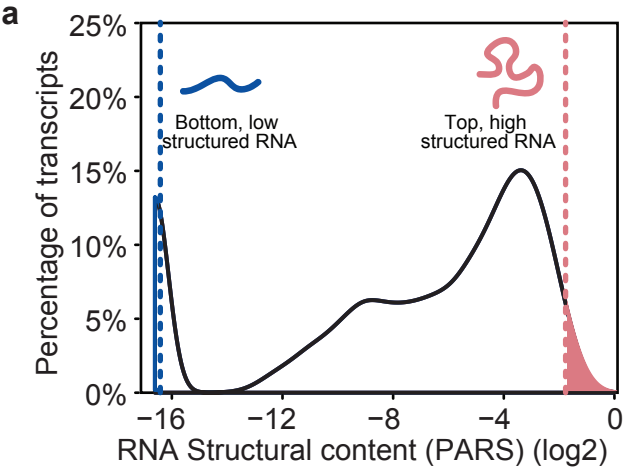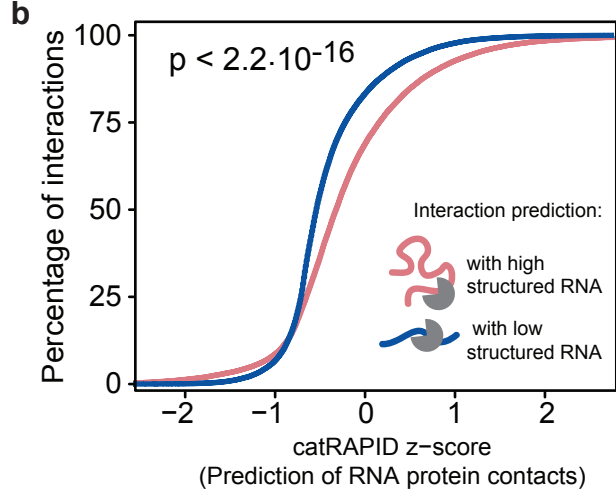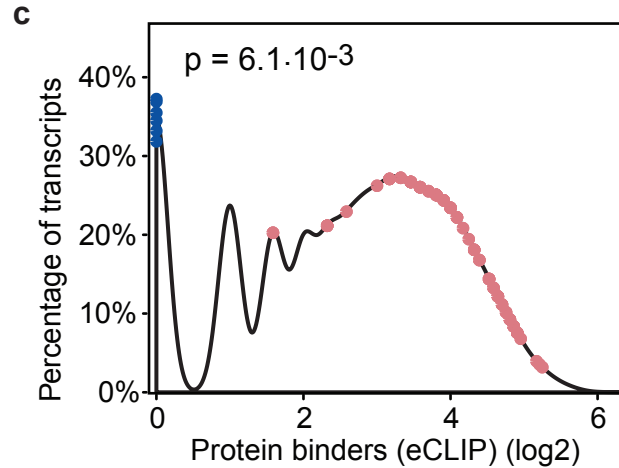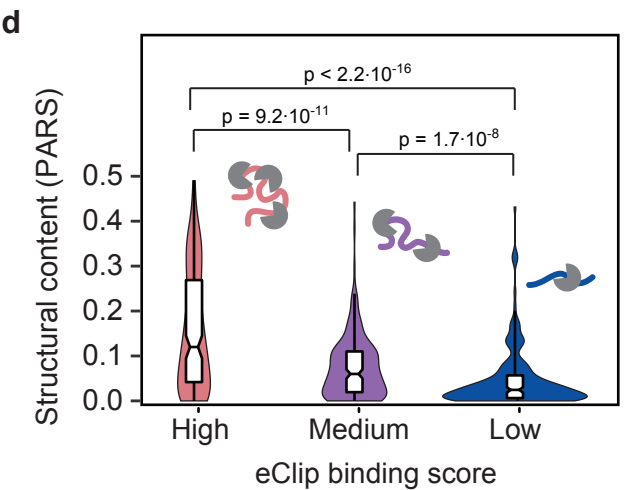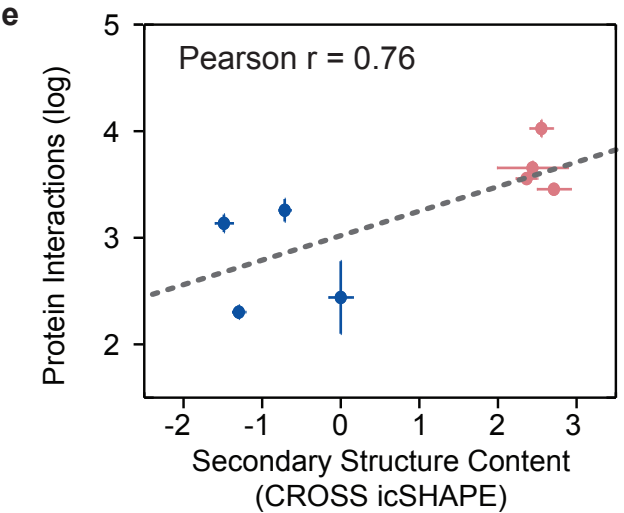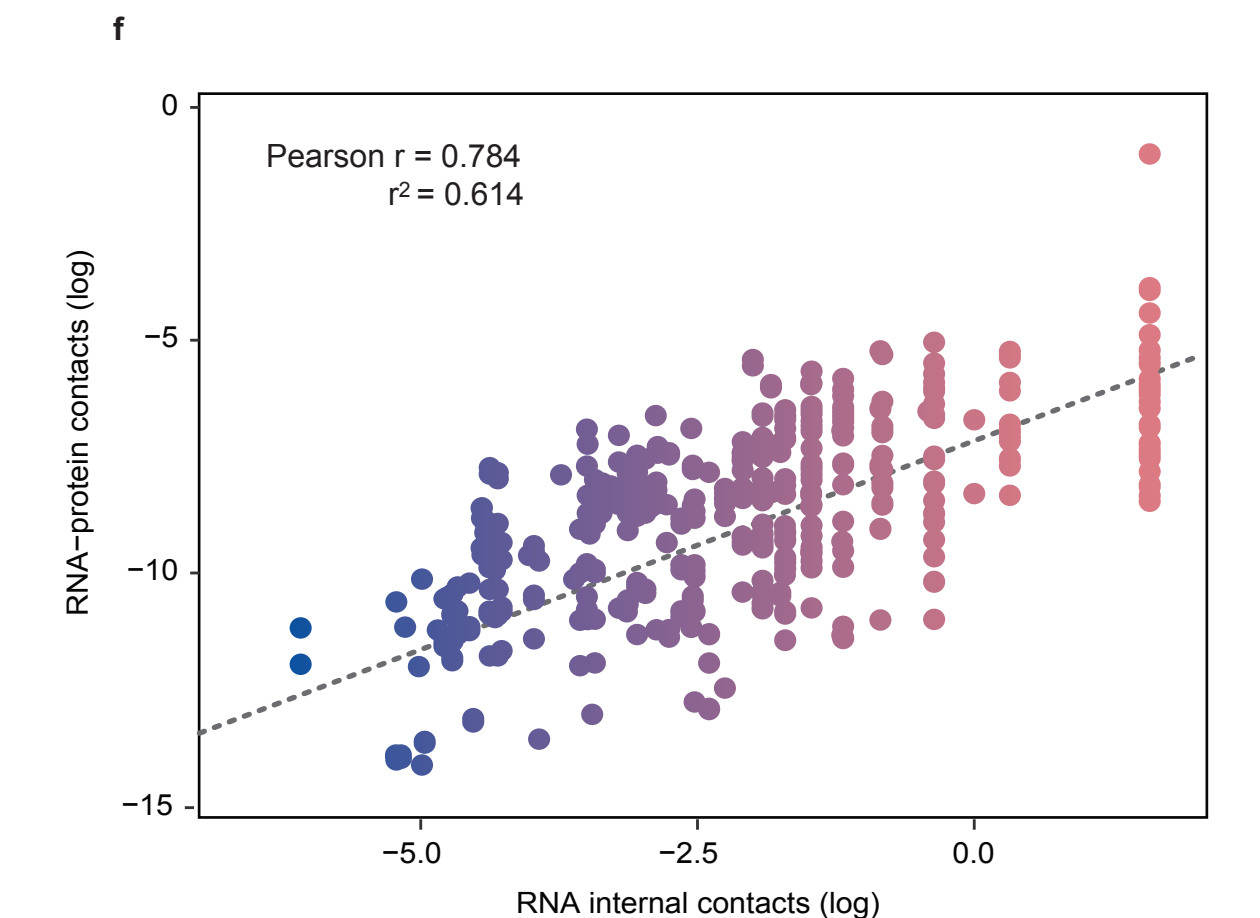

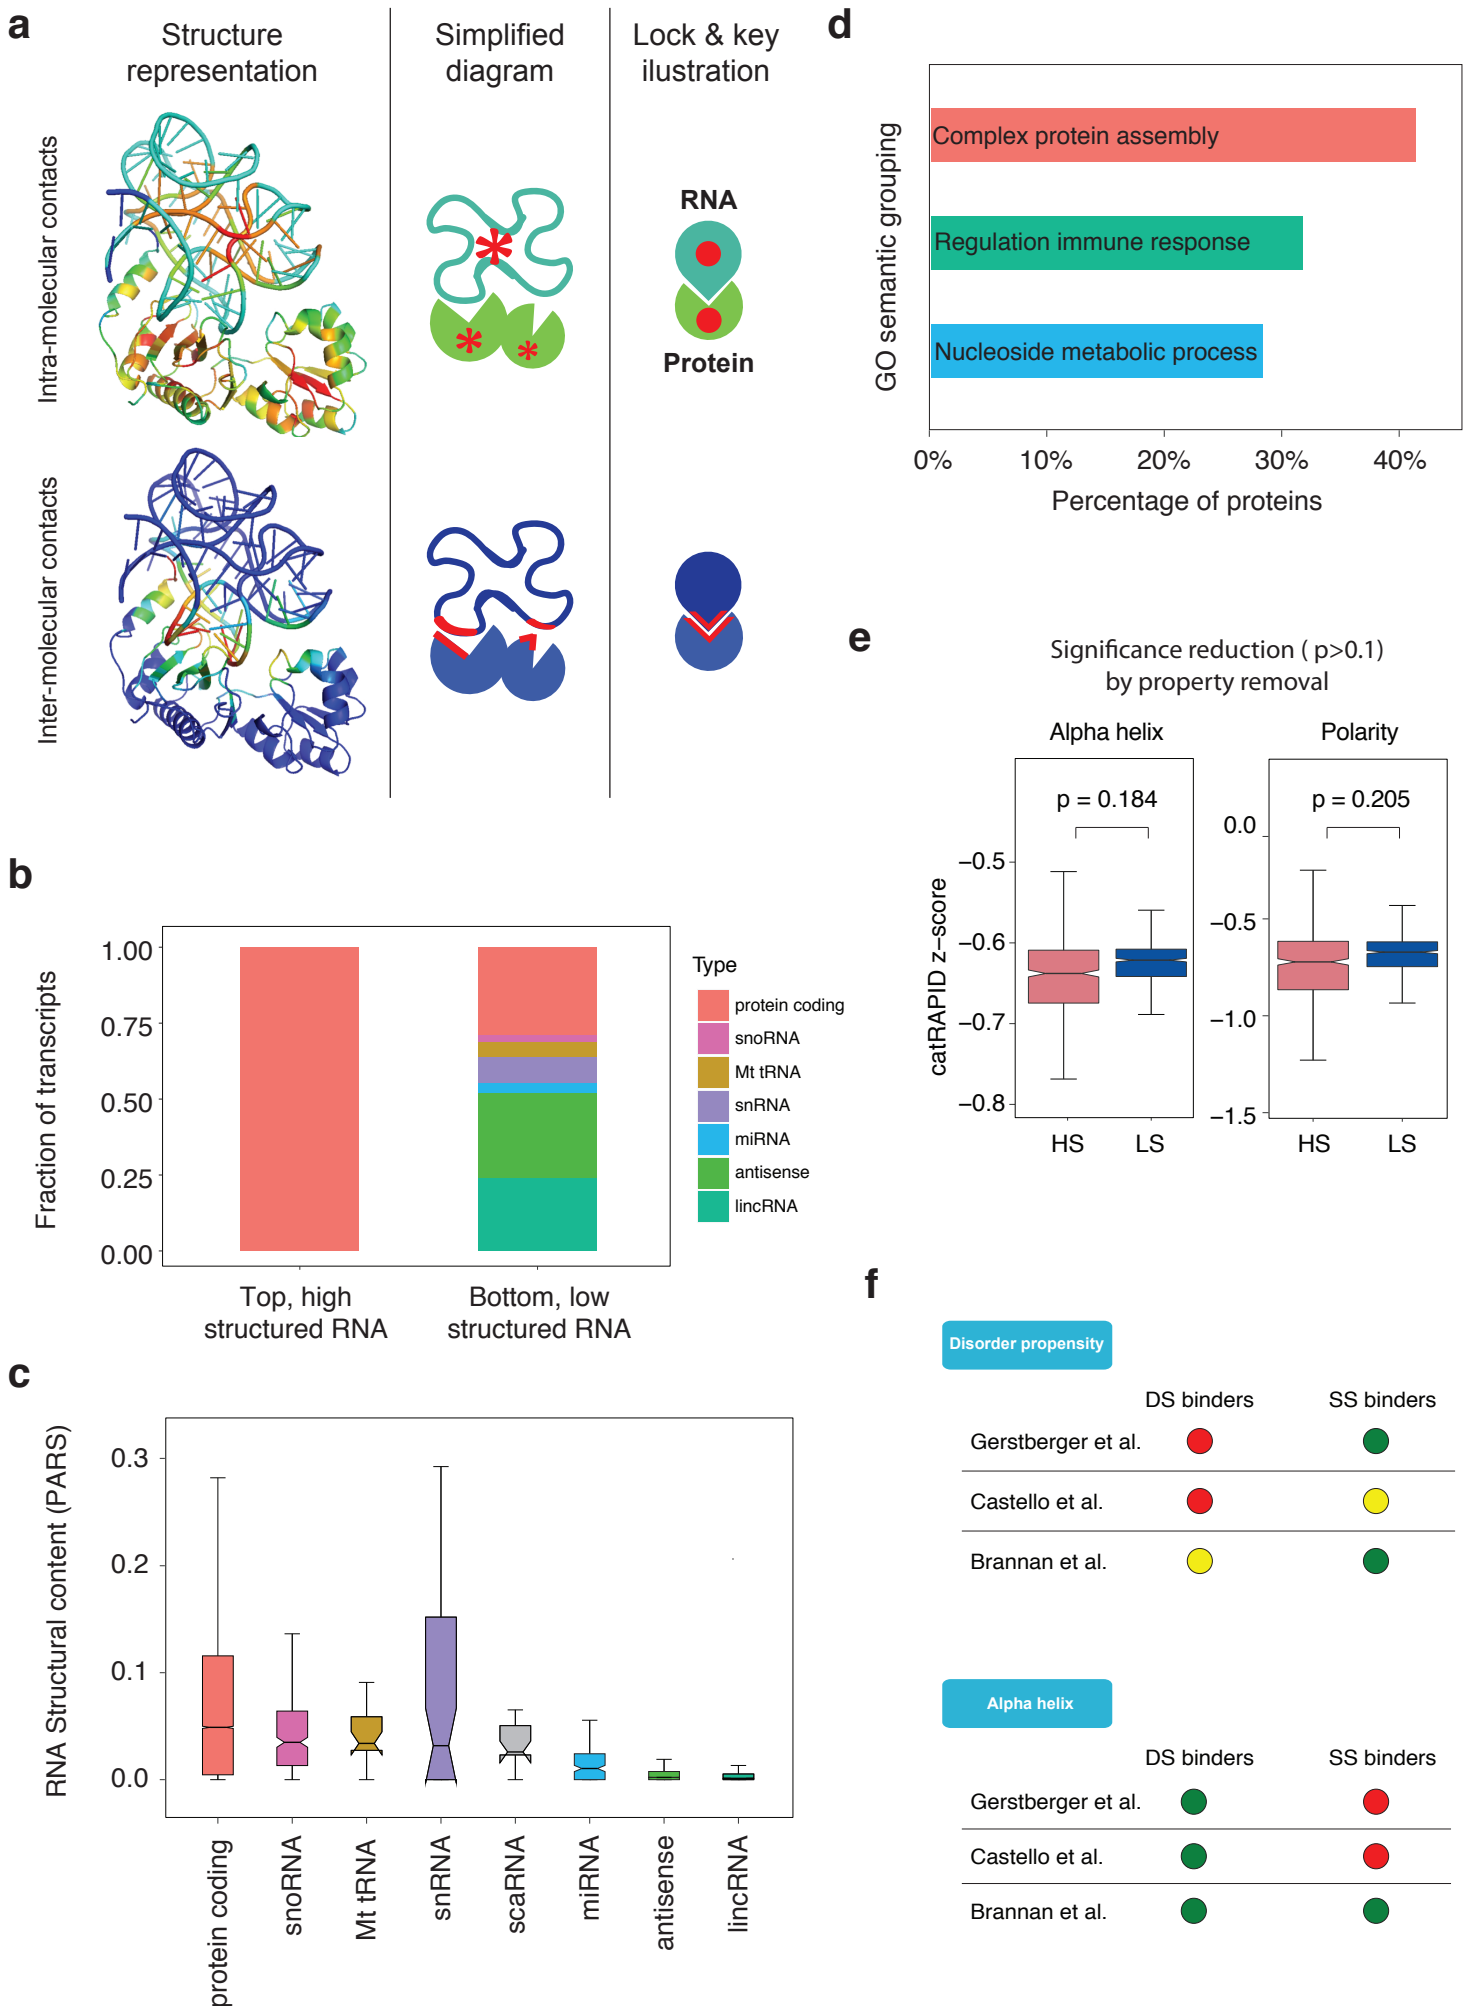

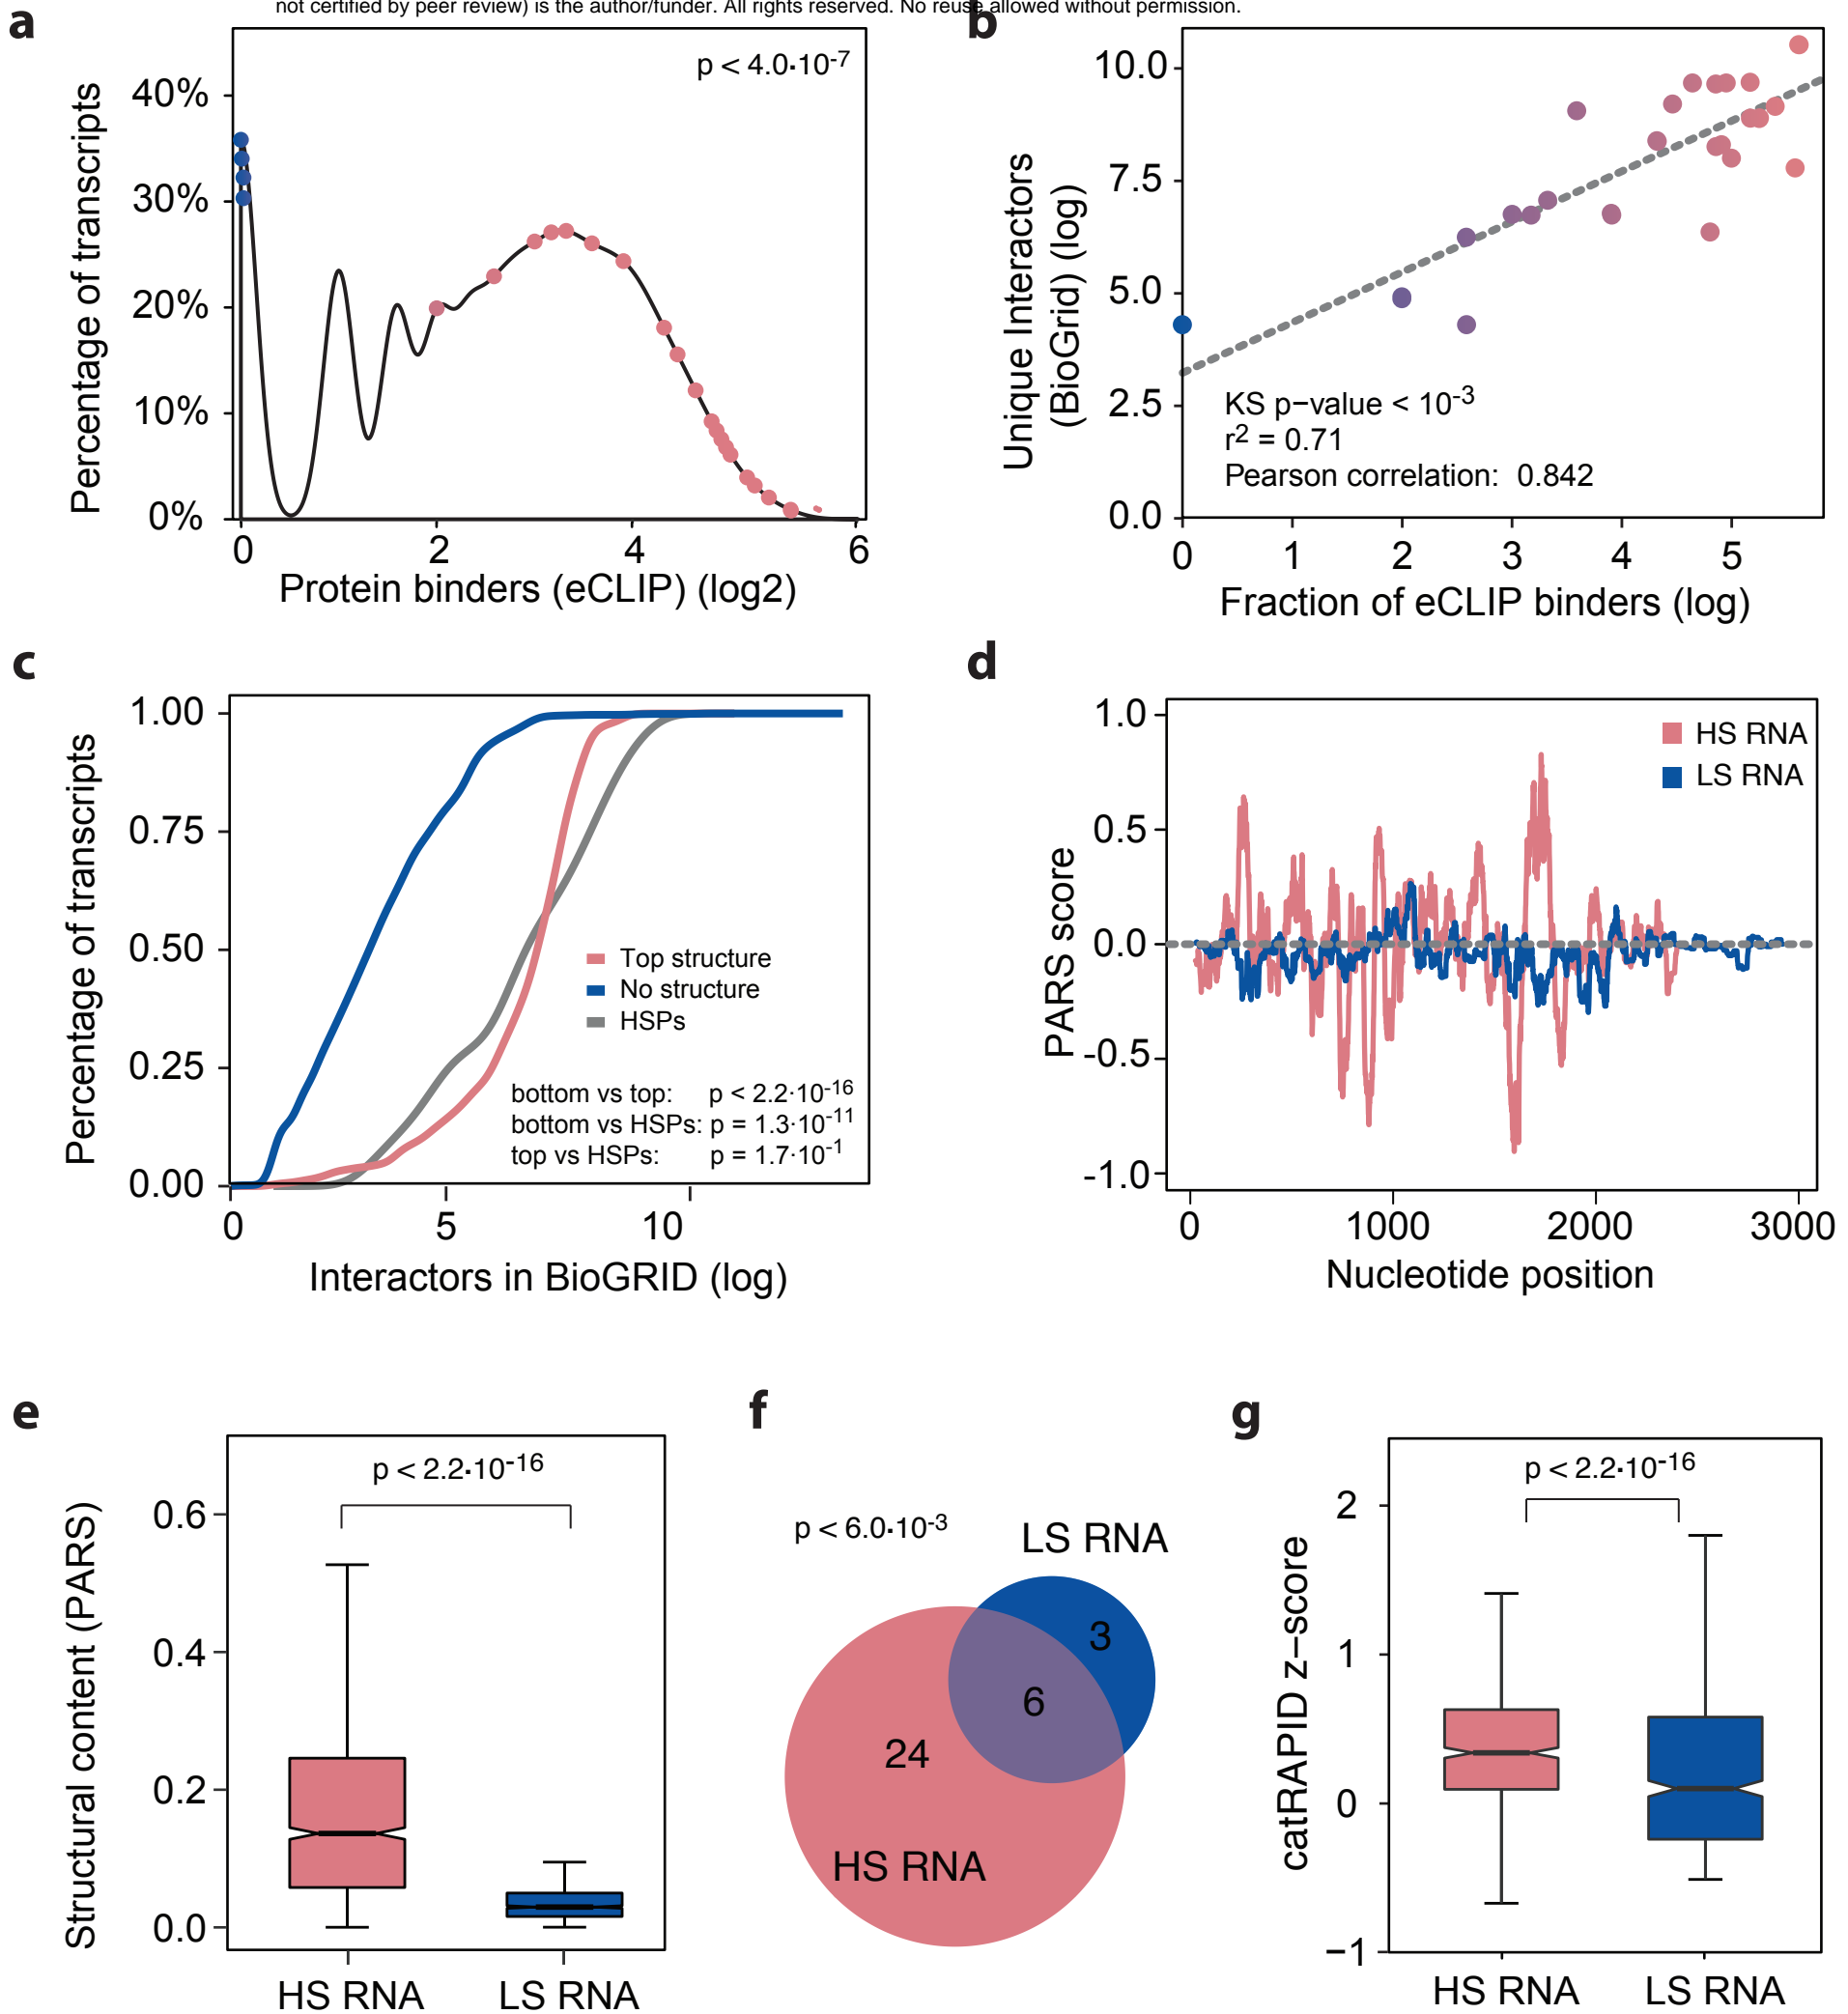

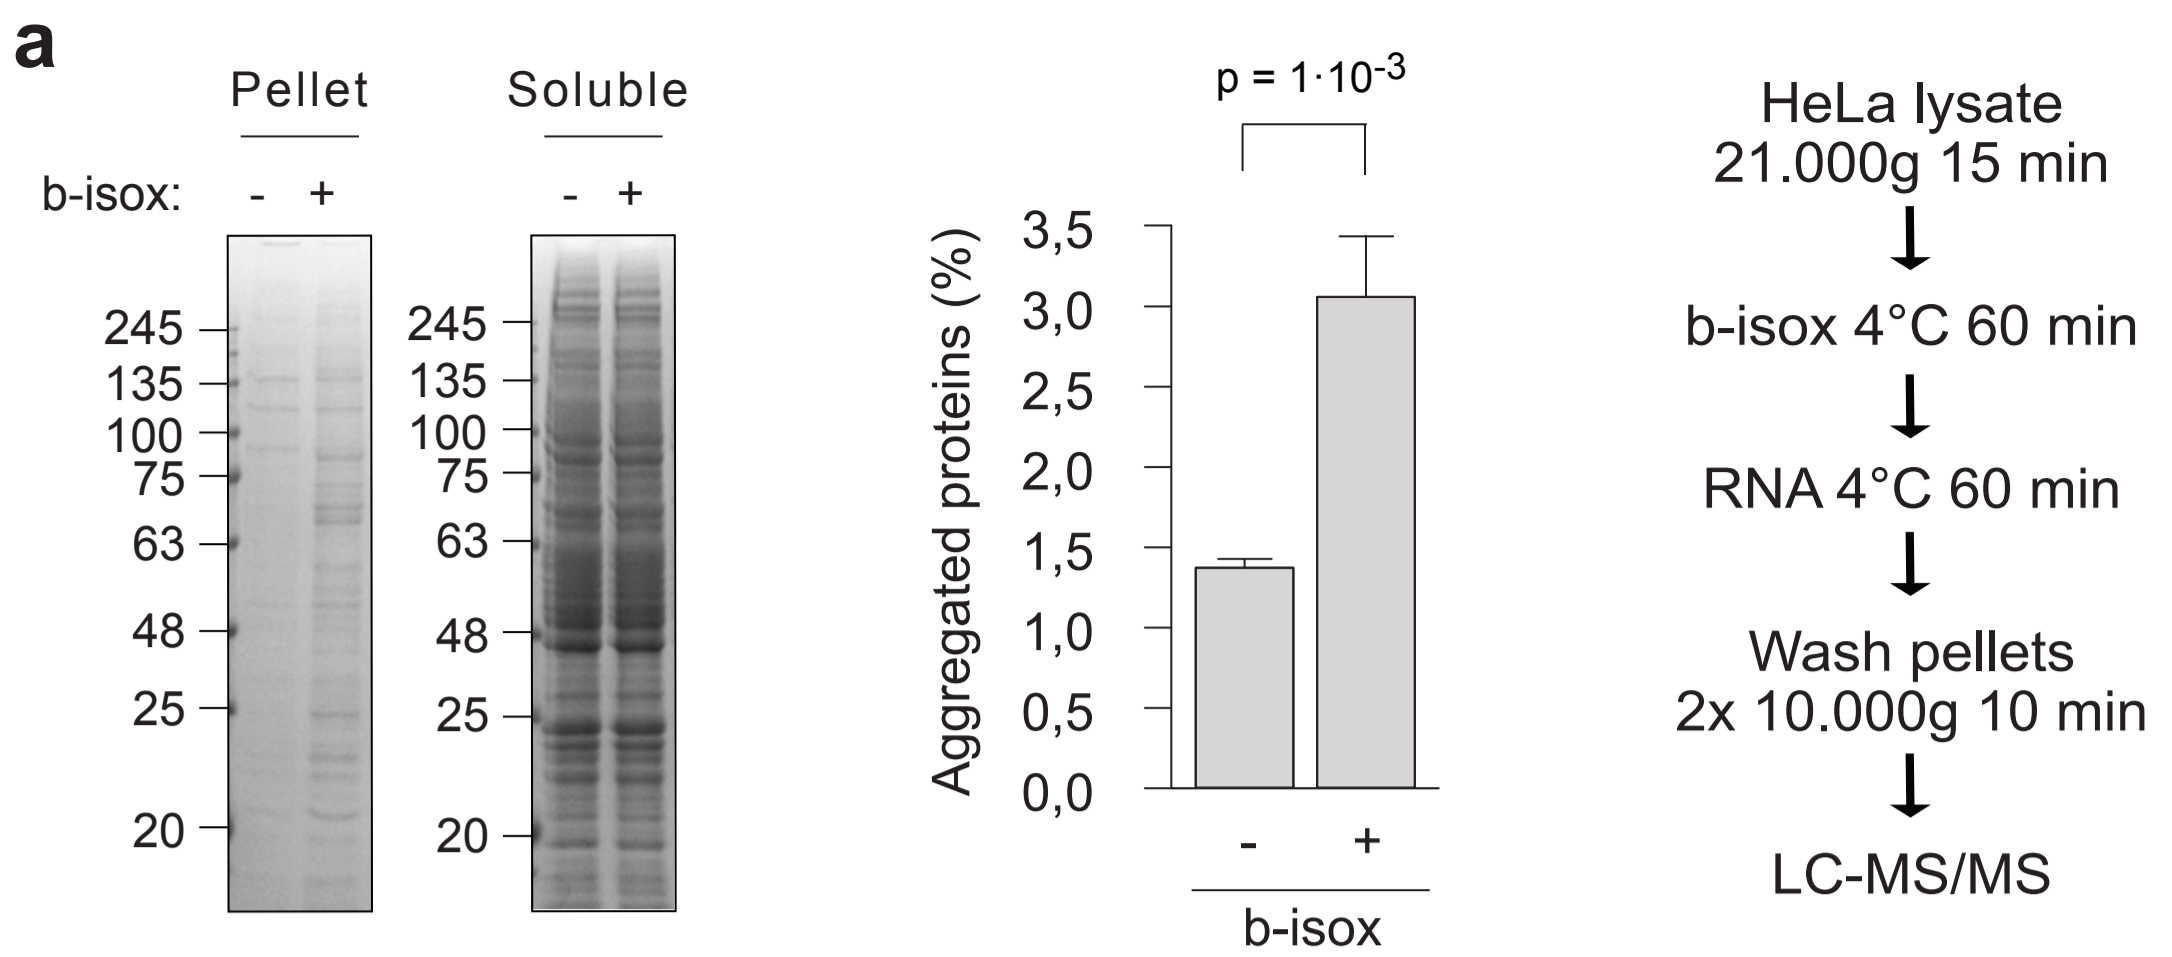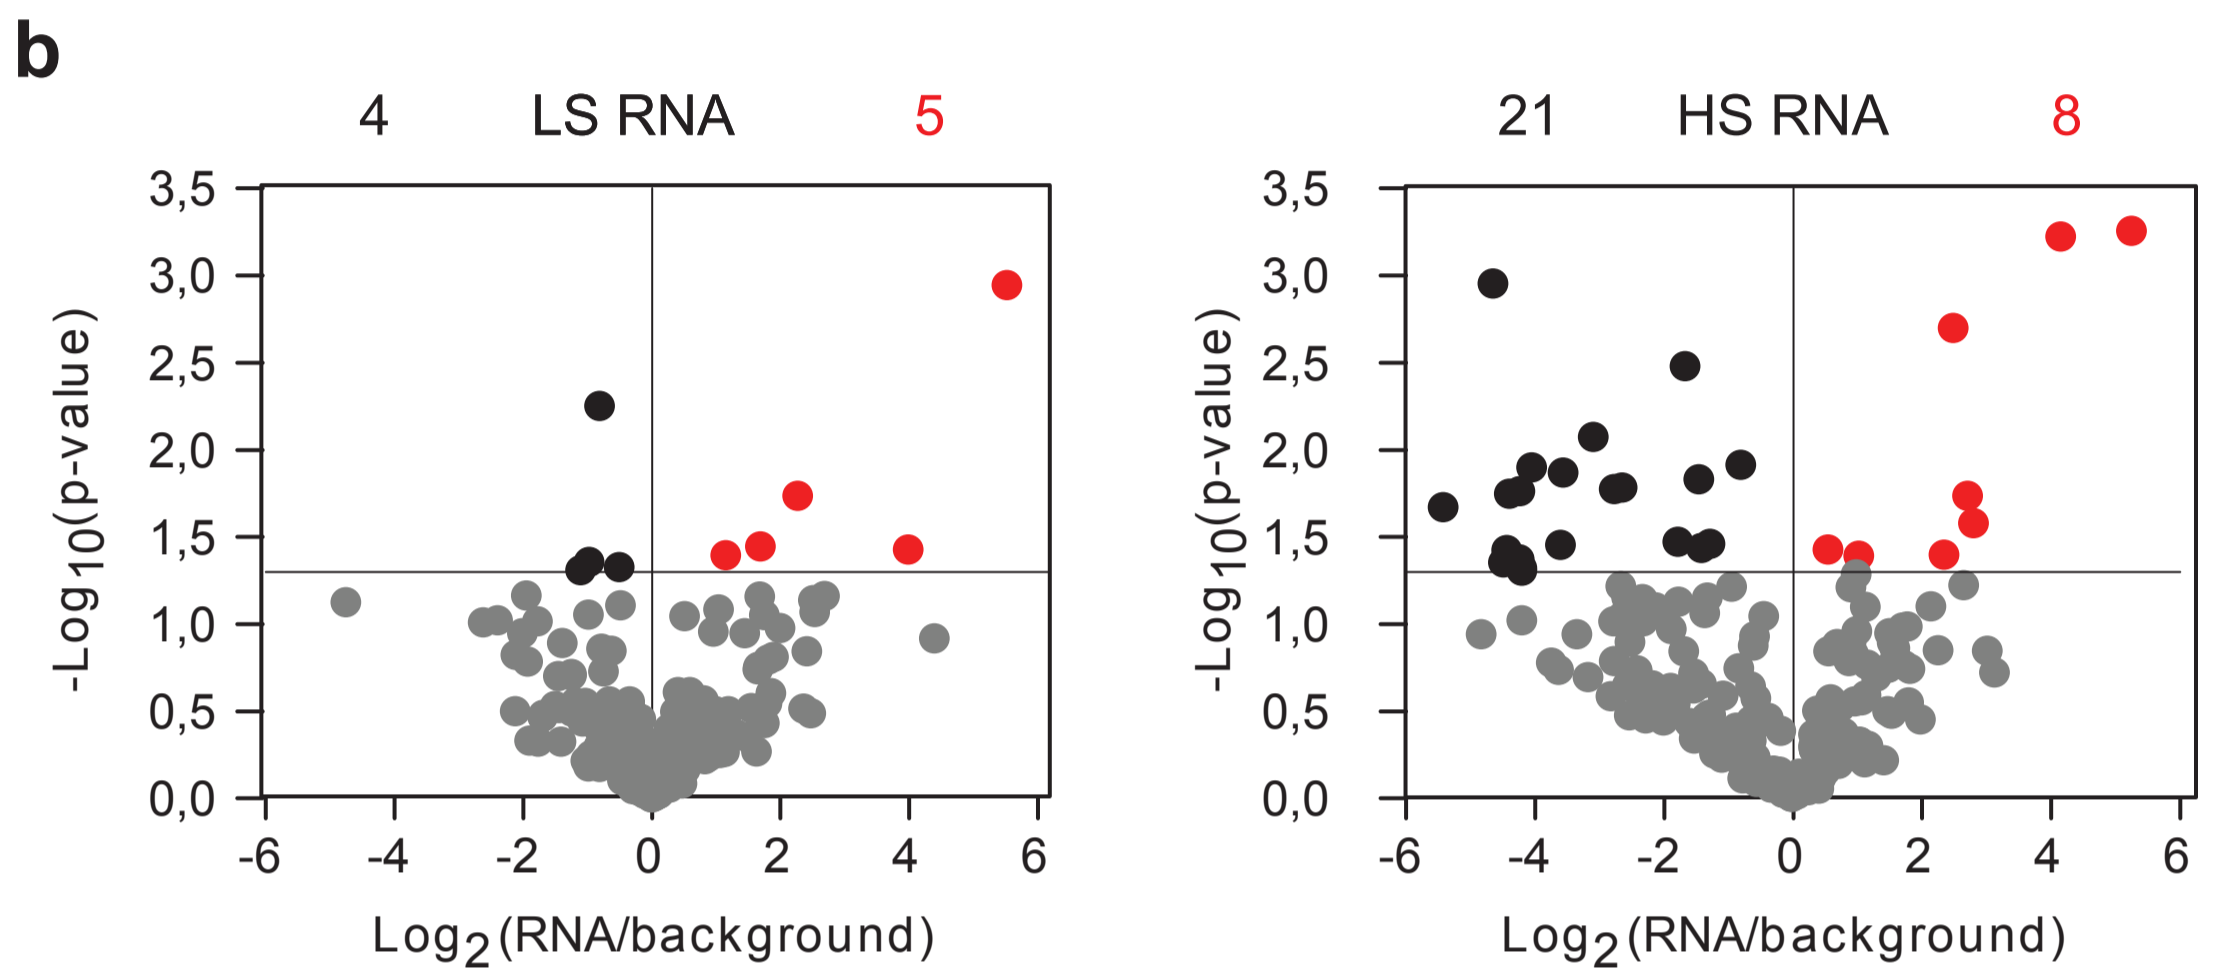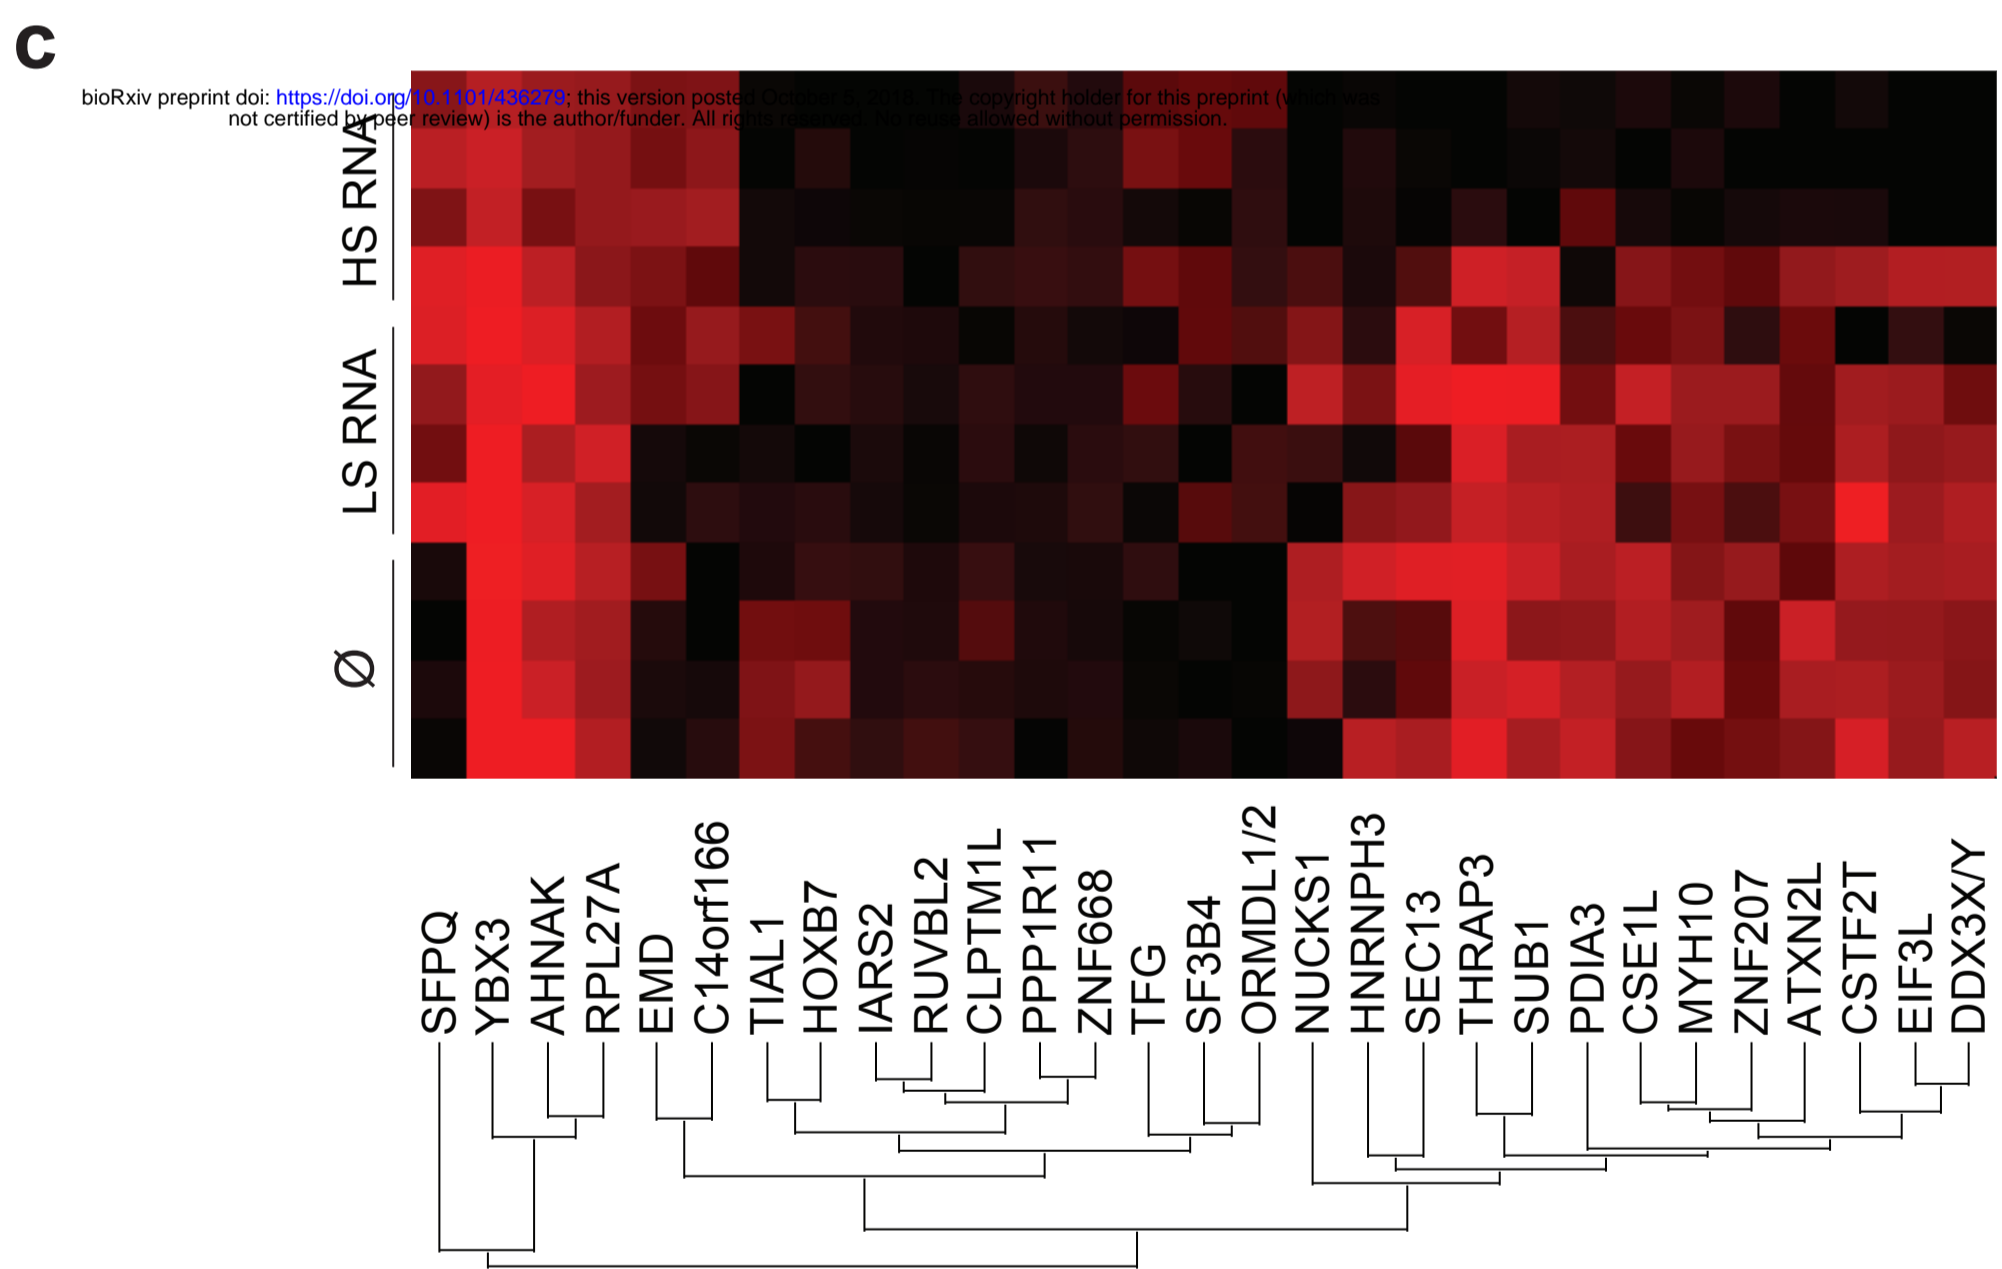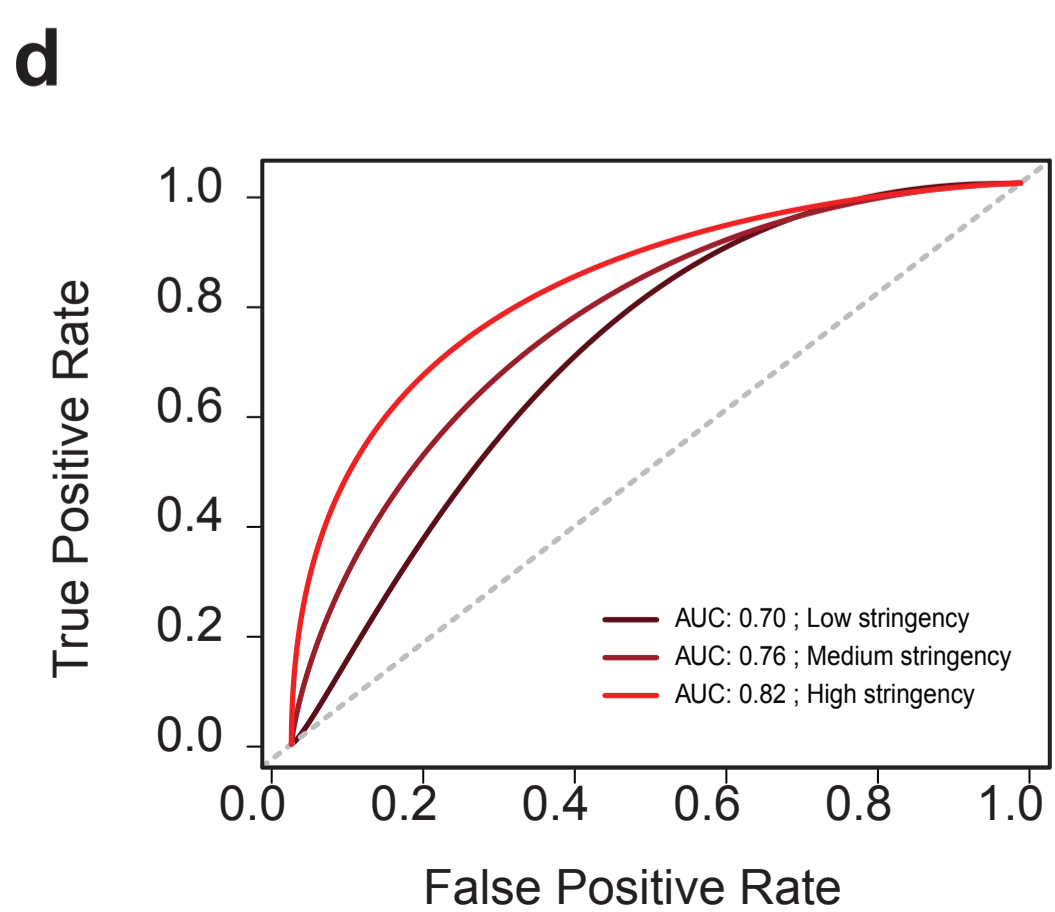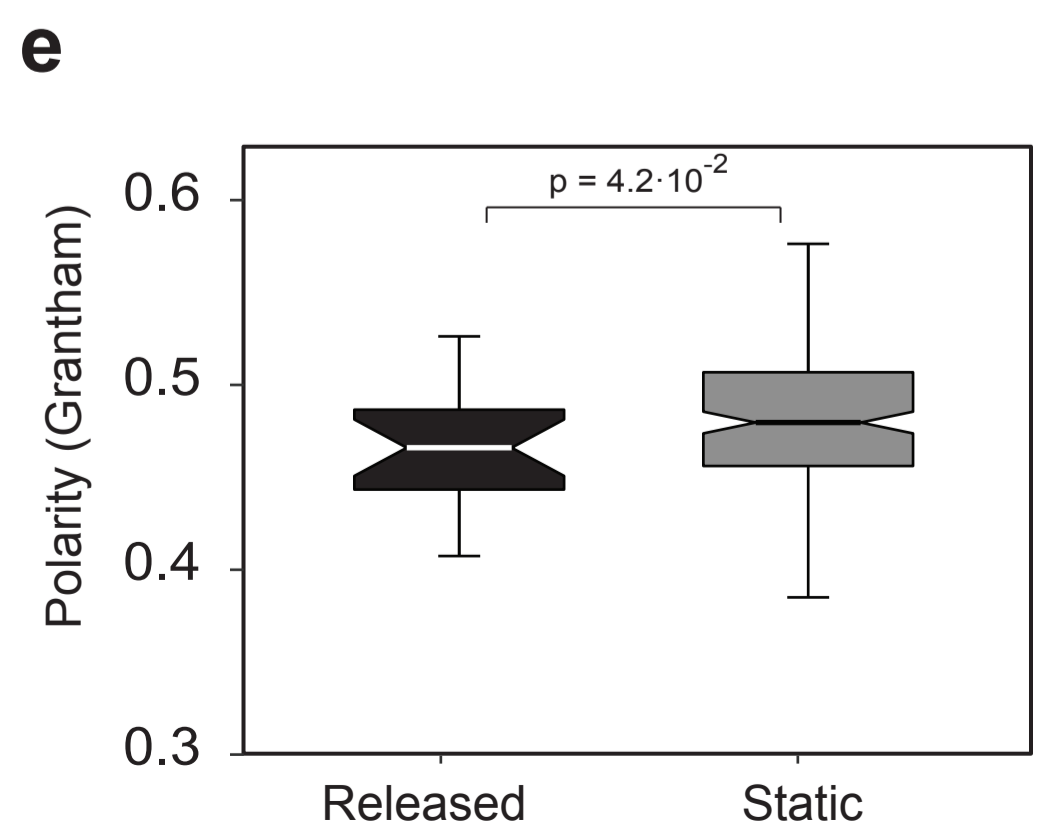

# The impact of the structure-driven protein interactivity

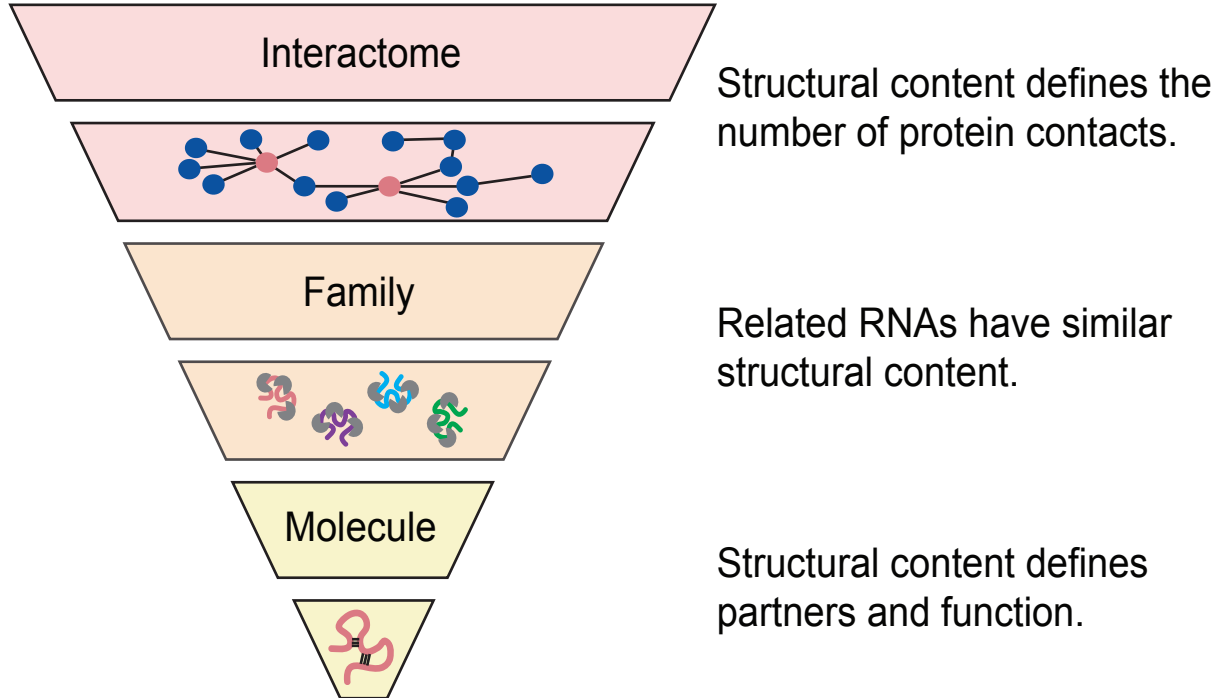

Source: https://www.biorxiv.org/content/10.1101/436279v1.full.pdf
